# Supplementary material for: Molecular Investigation of Canine Parvovirus-2 (CPV-2) Outbreak in Nevis Island: Analysis of the Nearly Complete Genomes of CPV-2 Strains from the Caribbean Region
Source: MDPI journal article supplement (doi:10.3390/v13061083), 2021-06-06
Supplement: s1 [file s1]

**Supplementary material S5.** Nucleotide (nt) mismatches between the nearly complete genome sequences (4269 nt, spanning all the coding regions) of canine parvovirus-2 (CPV-2) strain CPV12 (representing the earliest CPV-2 strains from the late 1970s) and CPV-2 strains detected on St. Kitts in 2016 (strain RVC50) and Nevis in 2020 (strains CN10, CN14 and CN20). Synonymous and nonsynonymous mutations that differed in a nt from the CPV12 sequence is shown with green and red, respectively. A ‘\*’ denotes an identical nt residue. Numbers to the right indicate the positions of the nt for respective CPV-2 strains.

|                      |                                                                |     |
|----------------------|----------------------------------------------------------------|-----|
| CPV12_USA_1978       | ATGTCCTGGCAACCAGTATACTGAGGAAGTTATGGAGGGAGTAAATTGGTTAAAGAAACAT  | 60  |
| RVC50_St._Kitts_2016 | ATGTCCTGGCAACCAGTATACTGAGGAAGTTATGGAGGGAGTAAATTGGTTAAAGAAACAT  | 60  |
| CN10_Nevis_2020      | ATGTCCTGGCAACCAGTATACTGAGGAAGTTATGGAGGGAGTAAATTGGTTAAAGAAACAT  | 60  |
| CN14_Nevis_2020      | ATGTCCTGGCAACCAGTATACTGAGGAAGTTATGGAGGGAGTAAATTGGTTAAAGAAACAT  | 60  |
| CN20_Nevis_2020      | ATGTCCTGGCAACCAGTATACTGAGGAAGTTATGGAGGGAGTAAATTGGTTAAAGAAACAT  | 60  |
|                      | *****                                                          |     |
| CPV12_USA_1978       | GCAGAAAATGAAGCATTTTCGTTTGTGTTTTTAAATGTGACAACGTCCAACATAATGGAAAG | 120 |
| RVC50_St._Kitts_2016 | GCAGAAAATGAAGCATTTTCGTTTGTGTTTTTAAATGTGACAACGTCCAACATAATGGAAAG | 120 |
| CN10_Nevis_2020      | GCAGAAAATGAAGCATTTTCGTTTGTGTTTTTAAATGTGACAACGTCCAACATAATGGAAAG | 120 |
| CN14_Nevis_2020      | GCAGAAAATGAAGCATTTTCGTTTGTGTTTTTAAATGTGACAACGTCCAACATAATGGAAAG | 120 |
| CN20_Nevis_2020      | GCAGAAAATGAAGCATTTTCGTTTGTGTTTTTAAATGTGACAACGTCCAACATAATGGAAAG | 120 |
|                      | *****                                                          |     |
| CPV12_USA_1978       | GATGTTTCGCTGGAACAACATATACCAAACCAATTCAAAATGAAGAGCTAACATCTTTAATT | 180 |
| RVC50_St._Kitts_2016 | GATGTTTCGCTGGAACAACATATACCAAACCAATTCAAAATGAAGAGCTAACATCTTTAATT | 180 |
| CN10_Nevis_2020      | GATGTTTCGCTGGAACAACATATACCAAACCAATTCAAAATGAAGAGCTAACATCTTTAATT | 180 |
| CN14_Nevis_2020      | GATGTTTCGCTGGAACAACATATACCAAACCAATTCAAAATGAAGAGCTAACATCTTTAATT | 180 |
| CN20_Nevis_2020      | GATGTTTCGCTGGAACAACATATACCAAACCAATTCAAAATGAAGAGCTAACATCTTTAATT | 180 |
|                      | *****                                                          |     |
| CPV12_USA_1978       | AGAGGAGCACAAACAGCAATGGATCAAACCGAAGAAGAAGAAATGGACTGGGAATCGGAA   | 240 |
| RVC50_St._Kitts_2016 | AGAGGAGCACAAACAGCAATGGATCAAACCGAAGAAGAAGAAATGGACTGGGAATCGGAA   | 240 |
| CN10_Nevis_2020      | AGAGGAGCACAAACAGCAATGGATCAAACCGAAGAAGAAGAAATGGACTGGGAATCGGAA   | 240 |
| CN14_Nevis_2020      | AGAGGAGCACAAACAGCAATGGATCAAACCGAAGAAGAAGAAATGGACTGGGAATCGGAA   | 240 |
| CN20_Nevis_2020      | AGAGGAGCACAAACAGCAATGGATCAAACCGAAGAAGAAGAAATGGACTGGGAATCGGAA   | 240 |
|                      | *****                                                          |     |
| CPV12_USA_1978       | GTTGATAGTCTCGCCAAAAAGCAAGTACAAACTTTTGATGCATTAATTAATAAATGTCTT   | 300 |
| RVC50_St._Kitts_2016 | GTTGATAGTCTCGCCAAAAAGCAAGTACAAACTTTTGATGCATTAATTAATAAATGTCTT   | 300 |
| CN10_Nevis_2020      | GTTGATAGTCTCGCCAAAAAGCAAGTACAAACTTTTGATGCATTAATTAATAAATGTCTT   | 300 |
| CN14_Nevis_2020      | GTTGATAGTCTCGCCAAAAAGCAAGTACAAACTTTTGATGCATTAATTAATAAATGTCTT   | 300 |
| CN20_Nevis_2020      | GTTGATAGTCTCGCCAAAAAGCAAGTACAAACTTTTGATGCATTAATTAATAAATGTCTT   | 300 |
|                      | *****                                                          |     |
| CPV12_USA_1978       | TTTGAAGTCTTTGTTTCTAAAAATATAGAACCAAATGAATGTGTTTGGTTTATTCAACAT   | 360 |
| RVC50_St._Kitts_2016 | TTTGAAGTCTTTGTTTCTAAAAATATAGAACCAAATGAATGTGTTTGGTTTATTCAACAT   | 360 |
| CN10_Nevis_2020      | TTTGAAGTCTTTGTTTCTAAAAATATAGAACCAAATGAATGTGTTTGGTTTATTCAACAT   | 360 |
| CN14_Nevis_2020      | TTTGAAGTCTTTGTTTCTAAAAATATAGAACCAAATGAATGTGTTTGGTTTATTCAACAT   | 360 |
| CN20_Nevis_2020      | TTTGAAGTCTTTGTTTCTAAAAATATAGAACCAAATGAATGTGTTTGGTTTATTCAACAT   | 360 |
|                      | *****                                                          |     |
| CPV12_USA_1978       | GAATGGGGAAAAGATCAAGGCTGGCATTGTCATGTTTTACTTCATAGTAAGAACTTACAA   | 420 |
| RVC50_St._Kitts_2016 | GAATGGGGAAAAGATCAAGGCTGGCATTGTCATGTTTTACTTCATAGTAAGAACTTACAA   | 420 |
| CN10_Nevis_2020      | GAATGGGGAAAAGATCAAGGCTGGCATTGTCATGTTTTACTTCATAGTAAGAACTTACAA   | 420 |
| CN14_Nevis_2020      | GAATGGGGAAAAGATCAAGGCTGGCATTGTCATGTTTTACTTCATAGTAAGAACTTACAA   | 420 |
| CN20_Nevis_2020      | GAATGGGGAAAAGATCAAGGCTGGCATTGTCATGTTTTACTTCATAGTAAGAACTTACAA   | 420 |
|                      | *****                                                          |     |
| CPV12_USA_1978       | CAAGCAACTGGTAAATGGCTACGCAGACAAATGAATATGTATTGGAGTAGATGGTTGGTG   | 480 |
| RVC50_St._Kitts_2016 | CAAGCAACTGGTAAATGGCTACGCAGACAAATGAATATGTATTGGAGTAGATGGTTGGTG   | 480 |
| CN10_Nevis_2020      | CAAGCAACTGGTAAATGGCTACGCAGACAAATGAATATGTATTGGAGTAGATGGTTGGTG   | 480 |
| CN14_Nevis_2020      | CAAGCAACTGGTAAATGGCTACGCAGACAAATGAATATGTATTGGAGTAGATGGTTGGTG   | 480 |
| CN20_Nevis_2020      | CAAGCAACTGGTAAATGGCTACGCAGACAAATGAATATGTATTGGAGTAGATGGTTGGTG   | 480 |
|                      | *****                                                          |     |

CPV12\_USA\_1978 ACTCTTTGTTTCGGTAAACTTAACACCAACTGAAAAGATTAAGCTCAGAGAAATTGCAGAA 540  
RVC50\_St.\_Kitts\_2016 ACTCTTTGTTTCGGTAAACTTAACACCAACTGAAAAAATTAAGCTCAGAGAAATTGCAGAA 540  
CN10\_Nevis\_2020 ACTCTTTGTTTCGGTAAACTTAACACCAACTGAAAAGATTAAGCTCAGAGAAATTGCAGAA 540  
CN14\_Nevis\_2020 ACTCTTTGTTTCGGTAAACTTAACACCAACTGAAAAGATTAAGCTCAGAGAAATTGCAGAA 540  
CN20\_Nevis\_2020 ACTCTTTGTTTCGGTAAACTTAACACCAACTGAAAAGATTAAGCTCAGAGAAATTGCAGAA 540

\*\*\*\*\*

CPV12\_USA\_1978 GATAGTGAATGGGTGACTATATTAACATACAGACATAAGCAAACAAAAAAGACTATGTT 600  
RVC50\_St.\_Kitts\_2016 GATAGTGAATGGGTGACTATATTAACATACAGACATAAGCAAACAAAAAAGACTATGTT 600  
CN10\_Nevis\_2020 GATAGTGAATGGGTGACTATATTAACATACAGACATAAGCAAACAAAAAAGACTATGTT 600  
CN14\_Nevis\_2020 GATAGTGAATGGGTGACTATATTAACATACAGACATAAGCAAACAAAAAAGACTATGTT 600  
CN20\_Nevis\_2020 GATAGTGAATGGGTGACTATATTAACATACAGACATAAGCAAACAAAAAAGACTATGTT 600

\*\*\*\*\*

CPV12\_USA\_1978 AAAATGGTTCATTTTGGAAATATGATAGCATATTACTTTTAAACAAAGAAAAAATTGTC 660  
RVC50\_St.\_Kitts\_2016 AAAATGGTTCATTTTGGAAATATGATAGCATATTACTTTTAAACAAAGAAAAAATTGTC 660  
CN10\_Nevis\_2020 AAAATGGTTCATTTTGGAAATATGATAGCATATTACTTTTAAACAAAGAAAAAATTGTC 660  
CN14\_Nevis\_2020 AAAATGGTTCATTTTGGAAATATGATAGCATATTACTTTTAAACAAAGAAAAAATTGTC 660  
CN20\_Nevis\_2020 AAAATGGTTCATTTTGGAAATATGATAGCATATTACTTTTAAACAAAGAAAAAATTGTC 660

\*\*\*\*\*

CPV12\_USA\_1978 CACATGACAAAAGAAAGTGGCTATTTTTTAAGTACTGATTCTGGTTGGAAATTTAACTTT 720  
RVC50\_St.\_Kitts\_2016 CACATGACAAAAGAAAGTGGCTATTTTTTAAGTACTGATTCTGGTTGGAAATTTAACTTT 720  
CN10\_Nevis\_2020 CACATGACAAAAGAAAGTGGCTATTTTTTAAGTACTGATTCTGGTTGGAAATTTAACTTT 720  
CN14\_Nevis\_2020 CACATGACAAAAGAAAGTGGCTATTTTTTAAGTACTGATTCTGGTTGGAAATTTAACTTT 720  
CN20\_Nevis\_2020 CACATGACAAAAGAAAGTGGCTATTTTTTAAGTACTGATTCTGGTTGGAAATTTAACTTT 720

\*\*\*\*\*

CPV12\_USA\_1978 ATGAAGTATCAAGACAGACAAATTGTGTCAGCACACTTTTACACTGAACAAATGAAACCAGAA 780  
RVC50\_St.\_Kitts\_2016 ATGAAGTATCAAGACAGACAAATTGTGTCAGCACACTTTTACACTGAACAAATGAAACCAGAA 780  
CN10\_Nevis\_2020 ATGAAATATCAAGACAGACAAATTGTGTCAGCACCTTTTACACTGAACAAATGAAACCAGAA 780  
CN14\_Nevis\_2020 ATGAAGTATCAAGACAGACAAATTGTGTCAGCACACTTTTACACTGAACAAATGAAACCAGAA 780  
CN20\_Nevis\_2020 ATGAAATATCAAGACAGACAAATTGTGTCAGCACCTTTTACACTGAACAAATGAAACCAGAA 780

\*\*\*\*\*

CPV12\_USA\_1978 ACCGTTGAAACCACAGTGACGACAGCACAGGAAACAAAGCGCGGGGAGAATTCAAACATAA 840  
RVC50\_St.\_Kitts\_2016 ACCGTTGAAACCACAGTGACGACAGCACAGGAAACAAAGCGCGGGGAGAATTCAAACATAA 840  
CN10\_Nevis\_2020 ACCGTTGAAACCACAGTGACGACAGCACAGGAAACAAAGCGCGGGGAGAATTCAAACATAA 840  
CN14\_Nevis\_2020 ACCGTTGAAACCACAGTGACGACAGCACAGGAAACAAAGCGCGGGGAGAATTCAAACATAA 840  
CN20\_Nevis\_2020 ACCGTTGAAACCACAGTGACGACAGCACAGGAAACAAAGCGCGGGGAGAATTCAAACATAA 840

\*\*\*\*\*

CPV12\_USA\_1978 AAGGAAGTGTCAATCAAATGTACTTTGCGGGACTTGGTTAGTAAAAGAGTAACATCACCT 900  
RVC50\_St.\_Kitts\_2016 AAGGAAGTGTCAATCAAATGTACTTTGCGGGACTTGGTTAGTAAAAGAGTAACATCACCT 900  
CN10\_Nevis\_2020 AAGGAAGTGTCAATCAAATGTACTTTGCGGGACTTGGTTAGTAAAAGAGTAACATCACCT 900  
CN14\_Nevis\_2020 AAGGAAGTGTCAATCAAATGTACTTTGCGGGACTTGGTTAGTAAAAGAGTAACATCACCT 900  
CN20\_Nevis\_2020 AAGGAAGTGTCAATCAAATGTACTTTGCGGGACTTGGTTAGTAAAAGAGTAACATCACCT 900

\*\*\*\*\*

CPV12\_USA\_1978 GAAGACTGGATGATGTTACAACCAGATAGTTATATTGAAATGATGGCACAACCAGGAGGT 960  
RVC50\_St.\_Kitts\_2016 GAAGACTGGATGATGTTACAACCAGATAGTTATATTGAAATGATGGCACAACCAGGAGGT 960  
CN10\_Nevis\_2020 GAAGACTGGATGATGTTACAACCAGATAGTTATATTGAAATGATGGCACAACCAGGAGGT 960  
CN14\_Nevis\_2020 GAAGACTGGATGATGTTACAACCAGATAGTTATATTGAAATGATGGCACAACCAGGAGGT 960  
CN20\_Nevis\_2020 GAAGACTGGATGATGTTACAACCAGATAGTTATATTGAAATGATGGCACAACCAGGAGGT 960

\*\*\*\*\*

CPV12\_USA\_1978 GAAAATCTTTTAAAAAATACACTTGAAATTTGTACTTTGACTTTAGCAAGAACAAAAACA 1020  
RVC50\_St.\_Kitts\_2016 GAAAATCTTTTAAAAAATACACTTGAAATTTGTACTTTGACTTTAGCAAGAACAAAAACA 1020  
CN10\_Nevis\_2020 GAAAATCTTTTAAAAAATACACTTGAAATTTGTACTTTGACTTTAGCAAGAACAAAAACA 1020  
CN14\_Nevis\_2020 GAAAATCTTTTAAAAAATACACTTGAAATTTGTACTTTGACTTTAGCAAGAACAAAAACA 1020  
CN20\_Nevis\_2020 GAAAATCTTTTAAAAAATACACTTGAAATTTGTACTTTGACTTTAGCAAGAACAAAAACA 1020  
\*\*\*\*\*

CPV12\_USA\_1978 GCATTTGAATTAATACTTGAAAAAGCAGATAATACTAACTAACTAACTTTGATCTTGCA 1080  
RVC50\_St.\_Kitts\_2016 GCATTTGAATTAATACTTGAAAAAGCAGATAATACTAACTAACTAACTTTGATCTTGCA 1080  
CN10\_Nevis\_2020 GCATTTGAATTAATACTTGAAAAAGCAGATAATACTAACTAACTAACTTTGATCTTGCA 1080  
CN14\_Nevis\_2020 GCATTTGAATTAATACTTGAAAAAGCAGATAATACTAACTAACTAACTTTGATCTTGCA 1080  
CN20\_Nevis\_2020 GCATTTGAATTAATACTTGAAAAAGCAGATAATACTAACTAACTAACTTTGATCTTGCA 1080  
\*\*\*\*\*

CPV12\_USA\_1978 AATTCTAGAACATGTCAAATTTTTAGAAATGCACGGATGGAATTGGATTAAAGTTTGTAC 1140  
RVC50\_St.\_Kitts\_2016 AATTCTAGAACATGTCAAATTTTTAGAAATGCACGGATGGAATTGGATTAAAGTTTGTAC 1140  
CN10\_Nevis\_2020 AATTCTAGAACATGTCAAATTTT CAGAATGCACGGATGGAATTGGATTAAAGTTTGTAC 1140  
CN14\_Nevis\_2020 AATTCTAGAACATGTCAAATTTTTAGAAATGCACGGATGGAATTGGATTAAAGTTTGTAC 1140  
CN20\_Nevis\_2020 AATTCTAGAACATGTCAAATTTT CAGAATGCACGGATGGAATTGGATTAAAGTTTGTAC 1140  
\*\*\*\*\*

CPV12\_USA\_1978 GCTATAGCATGTGTTTTAAATAGACAAGGTGGTAAAAGAAATACAGTTCTTTTTTCATGGA 1200  
RVC50\_St.\_Kitts\_2016 GCTATAGCATGTGTTTTAAATAGACAAGGTGGTAAAAGAAATACAGTTCTTTTTTCATGGA 1200  
CN10\_Nevis\_2020 GCTATAGCATGTGTTTTAAATAG CCAAGGTGGTAAAAGAAATACAGTTCTTTTTTCATGGA 1200  
CN14\_Nevis\_2020 GCTATAGCATGTGTTTTAAATAGCAAGGTGGTAAAAGAAATACAGTTCTTTTTTCATGGA 1200  
CN20\_Nevis\_2020 GCTATAGCATGTGTTTTAAATAG CCAAGGTGGTAAAAGAAATACAGTTCTTTTTTCATGGA 1200  
\*\*\*\*\*

CPV12\_USA\_1978 CCAGCAAGTACAGGAAAATCTATCATTGCTCAAGCCATAGCACAAAGCTGTGGGTAATGTT 1260  
RVC50\_St.\_Kitts\_2016 CCAGCAAGTACAGGAAAATCTATCATTGCTCAAGCCATAGCACAAAGCTGTGGGTAATGTT 1260  
CN10\_Nevis\_2020 CCAGCAAGTACAGGAAAATCTATCATTGCTCAAGCCATAGCACAAAGCTGTGGGTAATGTT 1260  
CN14\_Nevis\_2020 CCAGCAAGTACAGGAAAATCTATCATTGCTCAAGCCATAGCACAAAGCTGTGGGTAATGTT 1260  
CN20\_Nevis\_2020 CCAGCAAGTACAGGAAAATCTATCATTGCTCAAGCCATAGCACAAAGCTGTGGGTAATGTT 1260  
\*\*\*\*\*

CPV12\_USA\_1978 GGTTGTTATAATGCAGCAAATGTAAATTTTCCATTTAATGACTGTACCAATAAAAAATTTA 1320  
RVC50\_St.\_Kitts\_2016 GGTTGTTATAATGCAGCAAATGTAAATTTTCCATTTAATGACTG CACCAATAAAAAATTTA 1320  
CN10\_Nevis\_2020 GGTTGTTATAATGCAGCAAATGTAAATTTTCCATTTAATGACTG CACCAATAAAAAATTTA 1320  
CN14\_Nevis\_2020 GGTTGTTATAATGCAGCAAATGTAAATTTTCCATTTAATGACTG CACCAATAAAAAATTTA 1320  
CN20\_Nevis\_2020 GGTTGTTATAATGCAGCAAATGTAAATTTTCCATTTAATGACTG CACCAATAAAAAATTTA 1320  
\*\*\*\*\*

CPV12\_USA\_1978 ATTTGGATTGAAGAAGCTGGTAACTTTGGTCAACAAGTTAATCAATTTAAAGCAATTTGT 1380  
RVC50\_St.\_Kitts\_2016 ATTTGGATTGAAGAAGCTGGTAACTTTGGTCAACAAGTTAATCAATTTAAAGCAATTTGT 1380  
CN10\_Nevis\_2020 ATTTGGATTGAAGAAGCTGGTAACTTTGGTCAACAAGTTAATCAATTTAAAGCAATTTGT 1380  
CN14\_Nevis\_2020 ATTTGGATTGAAGAAGCTGGTAACTTTGGTCAACAAGTTAATCAATTTAAAGCAATTTGT 1380  
CN20\_Nevis\_2020 ATTTGGATTGAAGAAGCTGGTAACTTTGGTCAACAAGTTAATCAATTTAAAGCAATTTGT 1380  
\*\*\*\*\*

CPV12\_USA\_1978 TCTGGACAAACAATTAGAATTGATCAAAAAGGTAAAGGAAGTAAGCAAATTGAACCAACT 1440  
RVC50\_St.\_Kitts\_2016 TCTGGACAAACAATTAGAATTGATCAAAAAGGTAAAGGAAGTAAGCAAATTGAACCAACT 1440  
CN10\_Nevis\_2020 TCTGGACAAACAATTAGAATTGATCAAAAAGGTAAAGGAAGTAAGCAAATTGAACCAACT 1440  
CN14\_Nevis\_2020 TCTGGACAAACAATTAGAATTGATCAAAAAGGTAAAGGAAGTAAGCAAATTGAACCAACT 1440  
CN20\_Nevis\_2020 TCTGGACAAACAATTAGAATTGATCAAAAAGGTAAAGGAAGTAAGCAAATTGAACCAACT 1440  
\*\*\*\*\*

CPV12\_USA\_1978 CCAGTAATTATGACAACCTAATGAAAATATAACAATTGTGAGAATTGGATGTGAAGAAAGA 1500  
RVC50\_St.\_Kitts\_2016 CCAGTAATTATGACAACCTAATGAAAATATAACAATTGTGAGAATTGGATGTGAAGAAAGA 1500  
CN10\_Nevis\_2020 CCAGTAATTATGACAACCTAATGAAAATATAACAATTGTGAGAATTGGATGTGAAGAAAGA 1500  
CN14\_Nevis\_2020 CCAGTAATTATGACAACCTAATGAAAATATAACAATTGTGAGAATTGGATGTGAAGAAAGA 1500  
CN20\_Nevis\_2020 CCAGTAATTATGACAACCTAATGAAAATATAACAATTGTGAGAATTGGATGTGAAGAAAGA 1500  
\*\*\*\*\*

CPV12\_USA\_1978 CCTGAACATACACAACCAATAAGAGACAGAATGTTGAACATTAAGTTAGTATGTAAGCTT 1560  
RVC50\_St.\_Kitts\_2016 CCTGAACATACACAACCAATAAGAGACAGAATGTTGAACATTAAGTTAGTATGTAAGCTT 1560  
CN10\_Nevis\_2020 CCTGAACATACACAACCAATAAGAGACAGAATGTTGAACATTAAGTTAGTATGTAAGCTT 1560  
CN14\_Nevis\_2020 CCTGAACATACACAACCAATAAGAGACAGAATGTTGAACATTAAGTTAGTATGTAAGCTT 1560  
CN20\_Nevis\_2020 CCTGAACATACACAACCAATAAGAGACAGAATGTTGAACATTAAGTTAGTATGTAAGCTT 1560  
\*\*\*\*\*

CPV12\_USA\_1978 CCAGGAGACTTTGGTTTGGTTGATAAAGAAGAATGGCCTTTAATATGTGCATGGTTAGTT 1620  
RVC50\_St.\_Kitts\_2016 CCAGGAGACTTTGGTTTGGTTGATAAAGAAGAATGGCCTTTAATATGTGCATGGTTAGTT 1620  
CN10\_Nevis\_2020 CCAGGAGACTTTGGTTTGGTTGATAAAGAAGAATGGCCTTTAATATGTGCATGGTTAGTT 1620  
CN14\_Nevis\_2020 CCAGGAGACTTTGGTTTGGTTGATAAAGAAGAATGGCCTTTAATATGTGCATGGTTAGTT 1620  
CN20\_Nevis\_2020 CCAGGAGACTTTGGTTTGGTTGATAAAGAAGAATGGCCTTTAATATGTGCATGGTTAGTT 1620  
\*\*\*\*\*

CPV12\_USA\_1978 AAACATGGTTATGAATCAACCATGGCTAACTATACACATCATTGGGGAAAAGTACCAGAA 1680  
RVC50\_St.\_Kitts\_2016 AAGCATGGTTATGAATCAACCATGGCTAACTATACACATCATTGGGGAAAAGTACCAGAA 1680  
CN10\_Nevis\_2020 AAGCATGGTTATGAATCAACCATGGCTAACTATACACATCATTGGGGAAAAGTACCAGAA 1680  
CN14\_Nevis\_2020 AAACATGGTTATGAATCAACCATGGCTAACTATACACATCATTGGGGAAAAGTACCAGAA 1680  
CN20\_Nevis\_2020 AAGCATGGTTATGAATCAACCATGGCTAACTATACACATCATTGGGGAAAAGTACCAGAA 1680  
\*\* \*\*\*\*\*

CPV12\_USA\_1978 TGGGATGAAAACCTGGGCGGAGCCTAAAATACAAGAAGGTATAAAATTCACCAGGTTGCAAA 1740  
RVC50\_St.\_Kitts\_2016 TGGGATGAAAACCTGGGCGGAGCCTAAAATACAAGAAGGTATAAAATTCACCAGGTTGCAAA 1740  
CN10\_Nevis\_2020 TGGGATGAAAACCTGGGCGGAGCCTAAAATACAAGAAGGTATAAAATTCACCAGGTTGCAAA 1740  
CN14\_Nevis\_2020 TGGGATGAAAACCTGGGCGGAGCCTAAAATACAAGAAGGTATAAAATTCACCAGGTTGCAAA 1740  
CN20\_Nevis\_2020 TGGGATGAAAACCTGGGCGGAGCCTAAAATACAAGAAGGTATAAAATTCACCAGGTTGCAAA 1740  
\*\*\*\*\*

CPV12\_USA\_1978 GACTTAGAGACACAAGCGGCAAGCAATCCTCAGAGTCAAGACCAAGTTCTAACTCCTCTG 1800  
RVC50\_St.\_Kitts\_2016 GACTTAGAGACGCAAGCGGCAAGCAATCCTCAGAGTCAAGACCAAGTTCTAACTCCTCTG 1800  
CN10\_Nevis\_2020 GACTTAGAGACGCAAGCGGCAAGCAATCCTCAGAGTCAAGACCAAGTTCTAACTCCTCTG 1800  
CN14\_Nevis\_2020 GACTTAGAGACGCAAGCGGCAAGCAATCCTCAGAGTCAAGACCAAGTTCTAACTCCTCTG 1800  
CN20\_Nevis\_2020 GACTTAGAGACGCAAGCGGCAAGCAATCCTCAGAGTCAAGACCAAGTTCTAACTCCTCTG 1800  
\*\*\*\*\*

CPV12\_USA\_1978 ACTCCGGACGTAGTGGACCTTGCACTGGAACCGTGGAGTACTCCAGATACGCCTATTGCA 1860  
RVC50\_St.\_Kitts\_2016 ACTCCGGACGTAGTGGACCTTGCACTGGAACCGTGGAGTACTCCAGATACGCCTATTGCA 1860  
CN10\_Nevis\_2020 ACTCCGGACGTAGTGGACCTTGCACTGGAACCGTGGAGTACTCCAGATACGCCTATTGCA 1860  
CN14\_Nevis\_2020 ACTCCGGACGTAGTGGACCTTGCACTGGAACCGTGGAGTACTCCAGATACGCCTATTGCA 1860  
CN20\_Nevis\_2020 ACTCCGGACGTAGTGGACCTTGCACTGGAACCGTGGAGTACTCCAGATACGCCTATTGCA 1860  
\*\*\*\*\*

CPV12\_USA\_1978 GAAACTGCAAAATCAACAATCAAACCAACTTGGCGTTACTCACAAAGACGTGCAAGCGAGT 1920  
RVC50\_St.\_Kitts\_2016 GAAACTGCAAAATCAACAATCAAACCAACTTGGCGTTACTCACAAAGACGTGCAAGCGAGT 1920  
CN10\_Nevis\_2020 GAAACTGCAAAATCAACAATCAAACCAACTTGGCGTTACTCACAAAGACGTGCAAGCGAGT 1920  
CN14\_Nevis\_2020 GAAACTGCAAAATCAACAATCAAACCAACTTGGCGTTACTCACAAAGACGTGCAAGCGAGT 1920  
CN20\_Nevis\_2020 GAAACTGCAAAATCAACAATCAAACCAACTTGGCGTTACTCACAAAGACGTGCAAGCGAGT 1920  
\*\*\*\*\*

CPV12\_USA\_1978 CCGACATGGTCCGAAATAGAGGCAGACCTGAGAGCCATCTTTACTTCTGAACAATTGGAA 1980  
RVC50\_St.\_Kitts\_2016 CCAACCTGGTCCGAAATAGAGGCAGACCTGAGAGCCATCTTTACTTCTGAACAATTGGAA 1980  
CN10\_Nevis\_2020 CCAACCTGGTCCGAAATAGAGGCAGACCTGAGAGCCATCTTTACTTCTGAACAATTGGAA 1980  
CN14\_Nevis\_2020 CCAACCTGGTCCGAAATAGAGGCAGACCTGAGAGCCATCTTTACTTCTGAACAATTGGAA 1980  
CN20\_Nevis\_2020 CCAACCTGGTCCGAAATAGAGGCAGACCTGAGAGCCATCTTTACTTCTGAACAATTGGAA 1980  
\*\* \*\* \*\*\*\*\*

CPV12\_USA\_1978 GAAGATTTTCGAGACGACTTGGATTAAGGTACGATGGCACCTCCGGCAAAGAGAGCCAGG 2040  
RVC50\_St.\_Kitts\_2016 GAAGATTTTCGAGACGACTTGGATTAAGGTACGATGGCACCTCCGGCAAAGAGAGCCAGG 2040  
CN10\_Nevis\_2020 GAAGATTTTCGAGACGACTTGGATTAAGGTACGATGGCACCTCCGGCAAAGAGAGCCAGG 2040  
CN14\_Nevis\_2020 GAAGATTTTCGAGACGACTTGGATTAAGGTACGATGGCACCTCCGGCAAAGAGAGCCAGG 2040  
CN20\_Nevis\_2020 GAAGATTTTCGAGACGACTTGGATTAAGGTACGATGGCACCTCCGGCAAAGAGAGCCAGG 2040  
\*\*\*\*\*

CPV12\_USA\_1978 AGAGGTAAGGGTGTGTTAGTAAAGTGGGGGGAGGGGAAAGATTTAATACTTAACCTAAGT 2100  
RVC50\_St.\_Kitts\_2016 AGAGGTAAGGGTGTGTTAGTAAAGTGGGGGGAGGGGAAAGATTTAATACTTAACCTAAGT 2100  
CN10\_Nevis\_2020 AGAGGTAAGGGTGTGTTAGTAAAGTGGGGGGAGGGGAAAGATTTAATACTTAACCTAAGT 2100  
CN14\_Nevis\_2020 AGAGGTAAGGGTGTGTTAGTAAAGTGGGGGGAGGGGAAAGATTTAATACTTAACCTAAGT 2100  
CN20\_Nevis\_2020 AGAGGTAAGGGTGTGTTAGTAAAGTGGGGGGAGGGGAAAGATTTAATACTTAACCTAAGT 2100  
\*\*\*\*\*

CPV12\_USA\_1978 ATGTGTTTTTTTATAGGACTTGTGCCTCCAGGTTATAAATATCTTGGGCCTGGGAACAGT 2160  
RVC50\_St.\_Kitts\_2016 ATGTGTTTTTTTATAGGACTTGTGCCTCCAGGTTATAAATATCTTGGGCCTGGGAACAGT 2160  
CN10\_Nevis\_2020 ATGTGTTTTTTTATAGGACTTGTGCCTCCAGGTTATAAATATCTTGGGCCTGGGAACAGT 2160  
CN14\_Nevis\_2020 ATGTGTTTTTTTATAGGACTTGTGCCTCCAGGTTATAAATATCTTGGGCCTGGGAACAGT 2160  
CN20\_Nevis\_2020 ATGTGTTTTTTTATAGGACTTGTGCCTCCAGGTTATAAATATCTTGGGCCTGGGAACAGT 2160  
\*\*\*\*\*

CPV12\_USA\_1978 CTTGACCAAGGAGAACCAACTAACCCTTCTGACGCCGCTGCAAAAGAACACGACGAAGCT 2220  
RVC50\_St.\_Kitts\_2016 CTTGACCAAGGAGAACCAACTAACCCTTCTGACGCCGCTGCAAAAGAACACGACGAAGCT 2220  
CN10\_Nevis\_2020 CTTGACCAAGGAGAACCAACTAACCCTTCTGACGCCGCTGCAAAAGAACACGACGAAGCT 2220  
CN14\_Nevis\_2020 CTTGACCAAGGAGAACCAACTAACCCTTCTGACGCCGCTGCAAAAGAACACGACGAAGCT 2220  
CN20\_Nevis\_2020 CTTGACCAAGGAGAACCAACTAACCCTTCTGACGCCGCTGCAAAAGAACACGACGAAGCT 2220  
\*\*\*\*\*

CPV12\_USA\_1978 TACGCTGCTTATCTTCGCTCTGGTAAAAACCCATACTTATATTTCTCGCCAGCAGATCAA 2280  
RVC50\_St.\_Kitts\_2016 TACGCTGCTTATCTTCGCTCTGGTAAAAACCCATACTTATATTTCTCGCCAGCAGATCAA 2280  
CN10\_Nevis\_2020 TACGCTGCTTATCTTCGCTCTGGTAAAAACCCATACTTATATTTCTCGCCAGCAGATCAA 2280  
CN14\_Nevis\_2020 TACGCTGCTTATCTTCGCTCTGGTAAAAACCCATACTTATATTTCTCGCCAGCAGATCAA 2280  
CN20\_Nevis\_2020 TACGCTGCTTATCTTCGCTCTGGTAAAAACCCATACTTATATTTCTCGCCAGCAGATCAA 2280  
\*\*\*\*\*

CPV12\_USA\_1978 CGCTTTTATAGATCAAACCTAAGGACGCTAAAGATTGGGGGGGGAAAATAGGACATTATTTT 2340  
RVC50\_St.\_Kitts\_2016 CGCTTTTATAGATCAAACCTAAGGACGCTAAAGATTGGGGGGGGAAAATAGGACATTATTTT 2340  
CN10\_Nevis\_2020 CGCTTTTATAGATCAAACCTAAGGACGCTAAAGATTGGGGGGGGAAAATAGGACATTATTTT 2340  
CN14\_Nevis\_2020 CGCTTTTATAGATCAAACCTAAGGACGCTAAAGATTGGGGGGGGAAAATAGGACATTATTTT 2340  
CN20\_Nevis\_2020 CGCTTTTATAGATCAAACCTAAGGACGCTAAAGATTGGGGGGGGAAAATAGGACATTATTTT 2340  
\*\*\*\*\*

CPV12\_USA\_1978 TTTAGAGCTAAAAAGGCAATTGCTCCAGTATTAAGTATGATACACCAGATCATCCATCAACA 2400  
RVC50\_St.\_Kitts\_2016 TTTAGAGCTAAAAAGGCAATTGCTCCAGTATTAAGTATGATACACCAGATCATCCATCAACA 2400  
CN10\_Nevis\_2020 TTTAGAGCTAAAAAGGCAATTGCTCCAGTATTAAGTATGATACACCAGATCATCCATCAACA 2400  
CN14\_Nevis\_2020 TTTAGAGCTAAAAAGGCAATTGCTCCAGTATTAAGTATGATACACCAGATCATCCATCAACA 2400  
CN20\_Nevis\_2020 TTTAGAGCTAAAAAGGCAATTGCTCCAGTATTAAGTATGATACACCAGATCATCCATCAACA 2400  
\*\*\*\*\*

CPV12\_USA\_1978 TCAAGACCAACAAAACCAACTAAAAGAAGTAAACCACCACCTCATATTTTCATCAATCTT 2460  
RVC50\_St.\_Kitts\_2016 TCAAGACCAACAAAACCAACTAAAAGAAGTAAACCACCACCTCATATTTTCATCAATCTT 2460  
CN10\_Nevis\_2020 TCAAGACCAACAAAACCAACTAAAAGAAGTAAACCACCACCTCATATTTTCATCAATCTT 2460  
CN14\_Nevis\_2020 TCAAGACCAACAAAACCAACTAAAAGAAGTAAACCACCACCTCATATTTTCATCAATCTT 2460  
CN20\_Nevis\_2020 TCAAGACCAACAAAACCAACTAAAAGAAGTAAACCACCACCTCATATTTTCATCAATCTT 2460  
\*\*\*\*\*

CPV12\_USA\_1978 GCAAAAAAAAAAAAAAGCCGGTGCAGGACAAGTAAAAAGAGACAATCTTGCACCAATGAGT 2520  
RVC50\_St.\_Kitts\_2016 GCAAAAAAAAAAAAAAGCCGGTGCAGGACAAGTAAAAAGAGACAATCTTGCACCAATGAGT 2520  
CN10\_Nevis\_2020 GCAAAAAAAAAAAAAAGCCGGTGCAGGACAAGTAAAAAGAGACAATCTTGCACCAATGAGT 2520  
CN14\_Nevis\_2020 GCAAAAAAAAAAAAAAGCCGGTGCAGGACAAGTAAAAAGAGACAATCTTGCACCAATGAGT 2520  
CN20\_Nevis\_2020 GCAAAAAAAAAAAAAAGCCGGTGCAGGACAAGTAAAAAGAGACAATCTTGCACCAATGAGT 2520  
\*\*\*\*\*

CPV12\_USA\_1978 GATGGAGCAGTTCAACCAGACGGTGGTCAACCTGCTGTGAGAAATGAAAGAGCTACAGGA 2580  
RVC50\_St.\_Kitts\_2016 GATGGAGCAGTTCAACCAGACGGTGGTCAACCTGCTGTGAGAAATGAAAGAGCTACAGGA 2580  
CN10\_Nevis\_2020 GATGGAGCAGTTCAACCAGACGGTGGTCAACCTGCTGTGAGAAATGAAAGAGCTACAGGA 2580  
CN14\_Nevis\_2020 GATGGAGCAGTTCAACCAGACGGTGGTCAACCTGCTGTGAGAAATGAAAGAGCTACAGGA 2580  
CN20\_Nevis\_2020 GATGGAGCAGTTCAACCAGACGGTGGTCAACCTGCTGTGAGAAATGAAAGAGCTACAGGA 2580  
\*\*\*\*\*

CPV12\_USA\_1978 TCTGGGAACGGGTCTGGAGCGGGGGTGGTGGTGGTTCTGGGGGTGTGGGGATTTCTACG 2640  
RVC50\_St.\_Kitts\_2016 TCTGGGAACGGGTCTGGAGCGGGGGTGGTGGTGGTTCTGGGGGTGTGGGGATTTCTACG 2640  
CN10\_Nevis\_2020 TCTGGGAACGGGTCTGGAGCGGGGGTGGTGGTGGTTCTGGGGGTGTGGGGATTTCTACG 2640  
CN14\_Nevis\_2020 TCTGGGAACGGGTCTGGAGCGGGGGTGGTGGTGGTTCTGGGGGTGTGGGGATTTCTACG 2640  
CN20\_Nevis\_2020 TCTGGGAACGGGTCTGGAGCGGGGGTGGTGGTGGTTCTGGGGGTGTGGGGATTTCTACG 2640  
\*\*\*\*\*

CPV12\_USA\_1978 GGTACTTTCAATAATCAGACGGAATTTAAATTTTTTGAAAACGGATGGGTGGAAATCACA 2700  
RVC50\_St.\_Kitts\_2016 GGTACTTTCAATAATCAGACGGAATTTAAATTTTTTGAAAACGGATGGGTGGAAATCACA 2700  
CN10\_Nevis\_2020 GGTACTTTCAATAATCAGACGGAATTTAAATTTTTTGAAAACGGATGGGTGGAAATCACA 2700  
CN14\_Nevis\_2020 GGTACTTTCAATAATCAGACGGAATTTAAATTTTTTGAAAACGGATGGGTGGAAATCACA 2700  
CN20\_Nevis\_2020 GGTACTTTCAATAATCAGACGGAATTTAAATTTTTTGAAAACGGATGGGTGGAAATCACA 2700  
\*\*\*\*\*

CPV12\_USA\_1978 GCAAACCTCAAGCAGACTTGTACATTTAAATATGCCAGAAAAGTGAAAATTATAGAAGAGTG 2760  
RVC50\_St.\_Kitts\_2016 GCAAACCTCAAGCAGACTTGTACATTTAAATATGCCAGAAAAGTGAAAATTATAGAAGAGTG 2760  
CN10\_Nevis\_2020 GCAAACCTCAAGCAGACTTGTACATTTAAATATGCCAGAAAAGTGAAAATTATAGAAGAGTG 2760  
CN14\_Nevis\_2020 GCAAACCTCAAGCAGACTTGTACATTTAAATATGCCAGAAAAGTGAAAATTATAGAAGAGTG 2760  
CN20\_Nevis\_2020 GCAAACCTCAAGCAGACTTGTACATTTAAATATGCCAGAAAAGTGAAAATTATAGAAGAGTG 2760  
\*\*\*\*\*

CPV12\_USA\_1978 GTTGTAATAATATGGATAAAACTGCAGTTAACGGAACATGGCTTTAGATGATATTCAT 2820  
RVC50\_St.\_Kitts\_2016 GTTGTAATAATATGGATAAAACTGCAGTTAACGGAACATGGCTTTAGATGATATTCAT 2820  
CN10\_Nevis\_2020 GTTGTAATAATATGGATAAAACTGCAGTTAACGGAACATGGCTTTAGATGATATTCAT 2820  
CN14\_Nevis\_2020 GTTGTAATAATATGGATAAAACTGCAGTTAACGGAACATGGCTTTAGATGATATTCAT 2820  
CN20\_Nevis\_2020 GTTGTAATAATATGGATAAAACTGCAGTTAACGGAACATGGCTTTAGATGATATTCAT 2820  
\*\*\*\*\*

CPV12\_USA\_1978 GCACAAATTGTAACACCTTGGTCATTGGTTGATGCAAATGCTTGGGGAGTTTGGTTTAAAT 2880  
RVC50\_St.\_Kitts\_2016 GCACAAATTGTAACACCTTGGTCATTGGTTGATGCAAATGCTTGGGGAGTTTGGTTTAAAT 2880  
CN10\_Nevis\_2020 GCACAAATTGTAACACCTTGGTCATTGGTTGATGCAAATGCTTGGGGAGTTTGGTTTAAAT 2880  
CN14\_Nevis\_2020 GCACAAATTGTAACACCTTGGTCATTGGTTGATGCAAATGCTTGGGGAGTTTGGTTTAAAT 2880  
CN20\_Nevis\_2020 GCACAAATTGTAACACCTTGGTCATTGGTTGATGCAAATGCTTGGGGAGTTTGGTTTAAAT 2880  
\*\*\*\*\*

CPV12\_USA\_1978 CCAGGAGATTGGCAACTAATTGTTAATACTATGAGTGAGTTGCATTTAGTTAGTTTTGAA 2940  
RVC50\_St.\_Kitts\_2016 CCAGGAGATTGGCAACTAATTGTTAATACTATGAGTGAGTTACATTTAGTTAGTTTTGAG 2940  
CN10\_Nevis\_2020 CCAGGAGATTGGCAACTAATTGTTAATACTATGAGTGAGTTACATTTAGTTAGTTTTGAG 2940  
CN14\_Nevis\_2020 CCAGGAGATTGGCAACTAATTGTTAATACTATGAGTGAGTTACATTTAGTTAGTTTTGAG 2940  
CN20\_Nevis\_2020 CCAGGAGATTGGCAACTAATTGTTAATACTATGAGTGAGTTACATTTAGTTAGTTTTGAG 2940  
\*\*\*\*\*

CPV12\_USA\_1978 CAAGAAATTTTAAATGTTGTTTTAAAGACTGTTTCAGAATCTGCTACTCAGCCACCAACT 3000  
RVC50\_St.\_Kitts\_2016 CAAGAAATTTTAAATGTTGTTTTAAAGACTGTTTCAGAATCTGCTACTCAGCCACCAACT 3000  
CN10\_Nevis\_2020 CAAGAAATTTTAAATGTTGTTTTAAAGACTGTTTCAGAATCTGCTACTCAGCCACCAACT 3000  
CN14\_Nevis\_2020 CAAGAAATTTTAAATGTTGTTTTAAAGACTGTTTCAGAATCTGCTACTCAGCCACCAACT 3000  
CN20\_Nevis\_2020 CAAGAAATTTTAAATGTTGTTTTAAAGACTGTTTCAGAATCTGCTACTCAGCCACCAACT 3000  
\*\*\*\*\*

CPV12\_USA\_1978 AAAGTCTATAATAATGATTTAACTGCATCATTGATGGTTGCATTAGATAGTAATAATACT 3060  
RVC50\_St.\_Kitts\_2016 AAAGTTTATAATAATGATTTAACTGCATCATTGATGGTTGCATTAGATAGTAATAATACT 3060  
CN10\_Nevis\_2020 AAAGTTTATAATAATGATTTAACTGCATCATTGATGGTTGCATTAGATAGTAATAATACT 3060  
CN14\_Nevis\_2020 AAAGTTTATAATAATGATTTAACTGCATCATTGATGGTTGCATTAGATAGTAATAATACT 3060  
CN20\_Nevis\_2020 AAAGTTTATAATAATGATTTAACTGCATCATTGATGGTTGCATTAGATAGTAATAATACT 3060  
\*\*\*\*\*

CPV12\_USA\_1978 ATGCCATTTACTCCAGCAGCTATGAGATCTGAGACATTGGGTTTTTATCCATGGAAACCA 3120  
RVC50\_St.\_Kitts\_2016 ATGCCATTTACTCCAGCAGCTATGAGATCTGAGACATTGGGTTTTTATCCATGGAAACCA 3120  
CN10\_Nevis\_2020 ATGCCATTTACTCCAGCAGCTATGAGATCTGAGACATTGGGTTTTTATCCATGGAAACCA 3120  
CN14\_Nevis\_2020 ATGCCATTTACTCCAGCAGCTATGAGATCTGAGACATTGGGTTTTTATCCATGGAAACCA 3120  
CN20\_Nevis\_2020 ATGCCATTTACTCCAGCAGCTATGAGATCTGAGACATTGGGTTTTTATCCATGGAAACCA 3120  
\*\*\*\*\*

CPV12\_USA\_1978 ACCATACCAACTCCATGGAGATATTATTTTCAATGGGATAGAACATTAATACCATCTCAT 3180  
RVC50\_St.\_Kitts\_2016 ACCATACCAACTCCATGGAGATATTATTTTCAATGGGATAGAACATTAATACCATCTCAT 3180  
CN10\_Nevis\_2020 ACCATACCAACTCCATGGAGATATTATTTTCAATGGGATAGAACATTAATACCATCTCAT 3180  
CN14\_Nevis\_2020 ACCATACCAACTCCATGGAGATATTATTTTCAATGGGATAGAACATTAATACCATCTCAT 3180  
CN20\_Nevis\_2020 ACCATACCAACTCCATGGAGATATTATTTTCAATGGGATAGAACATTAATACCATCTCAT 3180  
\*\*\*\*\*

CPV12\_USA\_1978 ACTGGAAGTACTGGGCACACCAACAAATATATACCATGGTACAGATCCAGATGATGTTCAA 3240  
RVC50\_St.\_Kitts\_2016 ACTGGAAGTACTGGGCACACCAACAAATATATACCATGGTACAGATCCAGATGATGTTCAA 3240  
CN10\_Nevis\_2020 ACTGGAAGTACTGGGCACACCAACAAATATATACCATGGTACAGATCCAGATGATGTTCAA 3240  
CN14\_Nevis\_2020 ACTGGAAGTACTGGGCACACCAACAAATATATACCATGGTACAGATCCAGATGATGTTCAA 3240  
CN20\_Nevis\_2020 ACTGGAAGTACTGGGCACACCAACAAATATATACCATGGTACAGATCCAGATGATGTTCAA 3240  
\*\*\*\*\*

CPV12\_USA\_1978 TTTTATACTATTGAAAATTCTGTGCCAGTACACTTACTAAGAACAGGTGATGAATTTGCT 3300  
RVC50\_St.\_Kitts\_2016 TTTTATACTATTGAAAATTCTGTGCCAGTACACTTACTAAGAACAGGTGATGAATTTGCT 3300  
CN10\_Nevis\_2020 TTTTATACTATTGAAAATTCTGTGCCAGTACACTTACTAAGAACAGGTGATGAATTTGCT 3300  
CN14\_Nevis\_2020 TTTTATACTATTGAAAATTCTGTGCCAGTACACTTACTAAGAACAGGTGATGAATTTGCT 3300  
CN20\_Nevis\_2020 TTTTATACTATTGAAAATTCTGTGCCAGTACACTTACTAAGAACAGGTGATGAATTTGCT 3300  
\*\*\*\*\*

CPV12\_USA\_1978 ACAGGAACATTTTTTTTTGATTGTAAACCATGTAGACTAACACATACATGGCAAACAAAT 3360  
RVC50\_St.\_Kitts\_2016 ACAGGAACATTTTTTTTTGATTGTAAACCATGTAGACTAACACATACATGGCAAACAAAT 3360  
CN10\_Nevis\_2020 ACAGGAACATTTTTTTTTGATTGTAAACCATGTAGACTAACACATACATGGCAAACAAAT 3360  
CN14\_Nevis\_2020 ACAGGAACATTTTTTTTTGATTGTAAACCATGTAGACTAACACATACATGGCAAACAAAT 3360  
CN20\_Nevis\_2020 ACAGGAACATTTTTTTTTGATTGTAAACCATGTAGACTAACACATACATGGCAAACAAAT 3360  
\*\*\*\*\*

|                      |                                                                |      |
|----------------------|----------------------------------------------------------------|------|
| CPV12_USA_1978       | AGAGCATTTGGGCTTACCACCATTCTCTAAATTCTTTGCCTCAATCTGAAGGAGCTACTAAC | 3420 |
| RVC50_St._Kitts_2016 | AGAGCATTTGGGCTTACCACCATTCTCTAAATTCTTTGCCTCAAGCTGAAGGAGCTACTAAC | 3420 |
| CN10_Nevis_2020      | AGAGCATTTGGGCTTACCACCATTCTCTAAATTCTTTGCCTCAAGCTGAAGGAGCTACTAAC | 3420 |
| CN14_Nevis_2020      | AGAGCATTTGGGCTTACCACCATTCTCTAAATTCTTTGCCTCAAGCTGAAGGAGCTACTAAC | 3420 |
| CN20_Nevis_2020      | AGAGCATTTGGGCTTACCACCATTCTCTAAATTCTTTGCCTCAAGCTGAAGGAGCTACTAAC | 3420 |
|                      | *****                                                          |      |

|                      |                                                                |      |
|----------------------|----------------------------------------------------------------|------|
| CPV12_USA_1978       | TTTGGTGATATAGGAGTTCAACAAGATAAAAAGACGTGGTGTAACCTCAAATGGGAAATACA | 3480 |
| RVC50_St._Kitts_2016 | TTTGGTTATATAGGAGTTCAACAAGATAAAAAGACGTGGTGTAACCTCAAATGGGAAATACA | 3480 |
| CN10_Nevis_2020      | TTTGGTTATATAGGAGTTCAACAAGATAAAAAGACGTGGTGTAACCTCAAATGGGAAATACA | 3480 |
| CN14_Nevis_2020      | TTTGGTTATATAGGAGTTCAACAAGATAAAAAGACGTGGTGTAACCTCAAATGGGAAATACA | 3480 |
| CN20_Nevis_2020      | TTTGGTTATATAGGAGTTCAACAAGATAAAAAGACGTGGTGTAACCTCAAATGGGAAATACA | 3480 |
|                      | *****                                                          |      |

|                      |                                                               |      |
|----------------------|---------------------------------------------------------------|------|
| CPV12_USA_1978       | AACCTATATTACTGAAGCTACTATTATGAGACCAGCTGAGGTTGGTTATAGTGCACCATAT | 3540 |
| RVC50_St._Kitts_2016 | AACCTATATTACTGAAGCTACTATTATGAGACCAGCTGAGGTTGGTTATAGTGCACCATAT | 3540 |
| CN10_Nevis_2020      | AACCTATATTACTGAAGCTACTATTATGAGACCAGCTGAGGTTGGTTATAGTGCACCATAT | 3540 |
| CN14_Nevis_2020      | AACCTATATTACTGAAGCTACTATTATGAGACCAGCTGAGGTTGGTTATAGTGCACCATAT | 3540 |
| CN20_Nevis_2020      | AACCTATATTACTGAAGCTACTATTATGAGACCAGCTGAGGTTGGTTATAGTGCACCATAT | 3540 |
|                      | *****                                                         |      |

|                      |                                                              |      |
|----------------------|--------------------------------------------------------------|------|
| CPV12_USA_1978       | TATTCCTTTTGAGGCGTCTACACAAGGGCCATTTAAACACCTATTGCAGCAGGACGGGGG | 3600 |
| RVC50_St._Kitts_2016 | TATTCCTTTTGAGGCGTCTACACAAGGGCCATTTAAACACCTATTGCAGCAGGACGGGGG | 3600 |
| CN10_Nevis_2020      | TATTCCTTTTGAGGCGTCTACACAAGGGCCATTTAAACACCTATTGCAGCAGGACGGGGG | 3600 |
| CN14_Nevis_2020      | TATTCCTTTTGAGGCGTCTACACAAGGGCCATTTAAACACCTATTGCAGCAGGACGGGGG | 3600 |
| CN20_Nevis_2020      | TATTCCTTTTGAGGCGTCTACACAAGGGCCATTTAAACACCTATTGCAGCAGGACGGGGG | 3600 |
|                      | *****                                                        |      |

|                      |                                                               |      |
|----------------------|---------------------------------------------------------------|------|
| CPV12_USA_1978       | GGAGCGCAAACAGATGAAAATCAAGCAGCAGATGGTAAATCCAAGATATGCATTTGGTAGA | 3660 |
| RVC50_St._Kitts_2016 | GGAGCGCAAACAGATGAAAATCAAGCAGCAGATGGTATCCAAGATATGCATTTGGTAGA   | 3660 |
| CN10_Nevis_2020      | GGAGCGCAAACAGATGAAAATCAAGCAGCAGATGGTATCCAAGATATGCATTTGGTAGA   | 3660 |
| CN14_Nevis_2020      | GGAGCGCAAACAGATGAAAATCAAGCAGCAATGGTATCCAAGATATGCATTTGGTAGA    | 3660 |
| CN20_Nevis_2020      | GGAGCGCAAACAGATGAAAATCAAGCAGCAGATGGTATCCAAGATATGCATTTGGTAGA   | 3660 |
|                      | *****                                                         |      |

|                      |                                                               |      |
|----------------------|---------------------------------------------------------------|------|
| CPV12_USA_1978       | CAACATGGTCAAAAAACTACCACAACAGGAGAAACACCTGAGAGATTTACATATATAGCA  | 3720 |
| RVC50_St._Kitts_2016 | CAACATGGTCAAAAAACTACCACAACAGGAGAAACACCTGAGAGATTTACATATATAGCA  | 3720 |
| CN10_Nevis_2020      | CAACATGGTCAAAAAACTACCACAACAGGAGAAACACCTGAGAGATTTACATATATAGCA  | 3720 |
| CN14_Nevis_2020      | CAACATGGTCAAAAAACTACCACAACAGGAGAAACACCTGATGAGATTTACATATATAGCA | 3720 |
| CN20_Nevis_2020      | CAACATGGTCAAAAAACTACCACAACAGGAGAAACACCTGAGAGATTTACATATATAGCA  | 3720 |
|                      | *****                                                         |      |

|                      |                                                               |      |
|----------------------|---------------------------------------------------------------|------|
| CPV12_USA_1978       | CATCAAGATACAGGAAGATATCCAGAAGGAGATTGGATTCAAAATATTTAACTTTAACCTT | 3780 |
| RVC50_St._Kitts_2016 | CATCAAGATACAGGAAGATATCCAGAAGGAGATTGGATTCAAAATATTTAACTTTAACCTT | 3780 |
| CN10_Nevis_2020      | CATCAAGATACAGGAAGATATCCAGAAGGAGATTGGATTCAAAATATTTAACTTTAACCTT | 3780 |
| CN14_Nevis_2020      | CATCAAGATACAGGAAGATATCCAGAAGGAGATTGGATTCAAAATATTTAACTTTAACCTT | 3780 |
| CN20_Nevis_2020      | CATCAAGATACAGGAAGATATCCAGAAGGAGATTGGATTCAAAATATTTAACTTTAACCTT | 3780 |
|                      | *****                                                         |      |

|                      |                                                              |      |
|----------------------|--------------------------------------------------------------|------|
| CPV12_USA_1978       | CCTGTAACAAATGATAATGTATTGCTACCAACAGATCCAATTGGAGGTAAAACAGGAATT | 3840 |
| RVC50_St._Kitts_2016 | CCTGTAACAAATGATAATGTATTGCTACCAACAGATCCAATTGGAGGTAAAACAGGAATT | 3840 |
| CN10_Nevis_2020      | CCTGTAACAAATGATAATGTATTGCTACCAACAGATCCAATTGGAGGTAAAACAGGAATT | 3840 |
| CN14_Nevis_2020      | CCTGTAACAAATGATAATGTATTGCTACCAACAGATCCAATTGGAGGTAAAACAGGAATT | 3840 |
| CN20_Nevis_2020      | CCTGTAACAAATGATAATGTATTGCTACCAACAGATCCAATTGGAGGTAAAACAGGAATT | 3840 |
|                      | *****                                                        |      |



|                      |     |                                                           |      |
|----------------------|-----|-----------------------------------------------------------|------|
| CPV12_USA_1978       | AAC | TATACTAATATATTTAATACTTATGGTCCTTTAACTGCATTAAATAATGTACCACCA | 3900 |
| RVC50_St._Kitts_2016 | AAC | TATACTAATATATTTAATACTTATGGTCCTTTAACTGCATTAAATAATGTGCCACCA | 3900 |
| CN10_Nevis_2020      | AAC | TATACTAATATATTTAATACTTATGGTCCTTTAACTGCATTAAATAATGTGCCACCA | 3900 |
| CN14_Nevis_2020      | AAC | TATACTAATATATTTAATACTTATGGTCCTTTAACTGCATTAAATAATGTGCCACCA | 3900 |
| CN20_Nevis_2020      | AAC | TATACTAATATATTTAATACTTATGGTCCTTTAACTGCATTAAATAATGTGCCACCA | 3900 |
| *****                |     |                                                           |      |

|                      |                                                           |      |
|----------------------|-----------------------------------------------------------|------|
| CPV12_USA_1978       | CATGTAAATGCACCATTGTTTGTCAAATAATTGTCCTGGTCAATTATTGTAAAAGTT | 4020 |
| RVC50_St._Kitts_2016 | CATGTAAATGCACCATTGTTTGTCAAATAATTGTCCTGGTCAATTATTGTAAAGGTT | 4020 |
| CN10_Nevis_2020      | CATGTAAATGCACCATTGTTTGTCAAATAATTGTCCTGGTCAATTATTGTAAAGGTT | 4020 |
| CN14_Nevis_2020      | CATGTAAATGCACCATTGTTTGTCAAATAATTGTCCTGGTCAATTATTGTAAAGGTT | 4020 |
| CN20_Nevis_2020      | CATGTAAATGCACCATTGTTTGTCAAATAATTGTCCTGGTCAATTATTGTAAAGGTT | 4020 |
| *****                |                                                           |      |

|                      |                                                               |      |
|----------------------|---------------------------------------------------------------|------|
| CPV12_USA_1978       | GCGCCTAATTTAAACAAATGAATATGATCCTGATGCATCTGCTAATATGTCAAGAATTGTA | 4080 |
| RVC50_St._Kitts_2016 | GCGCCTAATCTAAACAAATGAATATGATCCTGATGCATCTGCTAATATGTCAAGAATTGTA | 4080 |
| CN10_Nevis_2020      | GCGCCTAATCTAAACAAATGAATATGATCCTGATGCATCTGCTAATATGTCAAGAATTGTA | 4080 |
| CN14_Nevis_2020      | GCGCCTAATCTAAACAAATGAATATGATCCTGATGCATCTGCTAATATGTCAAGAATTGTA | 4080 |
| CN20_Nevis_2020      | GCGCCTAATCTAAACAAATGAATATGATCCTGATGCATCTGCTAATATGTCAAGAATTGTA | 4080 |
| *****                |                                                               |      |

|                      |                                                             |      |
|----------------------|-------------------------------------------------------------|------|
| CPV12_USA_1978       | ACTTACTCAGATTTTGGTGGAAAGGTAAATTAGTATTTAAAGCTAAACTAAGAGCCTCT | 4140 |
| RVC50_St._Kitts_2016 | ACTTACTCAGATTTTGGTGGAAAGGTAAATTAGTATTTAAAGCTAAACTAAGAGCCTCT | 4140 |
| CN10_Nevis_2020      | ACTTACTCAGATTTTGGTGGAAAGGTAAATTAGTATTTAAAGCTAAACTAAGAGCCTCT | 4140 |
| CN14_Nevis_2020      | ACTTACTCAGATTTTGGTGGAAAGGTAAATTAGTATTTAAAGCTAAACTAAGAGCCTCT | 4140 |
| CN20_Nevis_2020      | ACTTACTCAGATTTTGGTGGAAAGGTAAATTAGTATTTAAAGCTAAACTAAGAGCCTCT | 4140 |
| *****                |                                                             |      |

|                      |                                                              |      |
|----------------------|--------------------------------------------------------------|------|
| CPV12_USA_1978       | CATACTTGGAATCCAATTCAACAAATGAGTATTAATGTAGATAACCAATTTAACTATGTA | 4200 |
| RVC50_St._Kitts_2016 | CATACTTGGAATCCAATTCAACAAATGAGTATTAATGTAGATAACCAATTTAACTATGTA | 4200 |
| CN10_Nevis_2020      | CATACTTGGAATCCAATTCAACAAATGAGTATTAATGTAGATAACCAATTTAACTATGTA | 4200 |
| CN14_Nevis_2020      | CATACTTGGAATCCAATTCAACAAATGAGTATTAATGTAGATAACCAATTTAACTATGTA | 4200 |
| CN20_Nevis_2020      | CATACTTGGAATCCAATTCAACAAATGAGTATTAATGTAGATAACCAATTTAACTATGTA | 4200 |
| *****                |                                                              |      |

|                      |                                                              |      |
|----------------------|--------------------------------------------------------------|------|
| CPV12_USA_1978       | CCAAGTAATATTGGAGGTATGAAAATTGTATATGAAAAATCTCAACTAGCACCTAGAAAA | 4260 |
| RVC50_St._Kitts_2016 | CCAAGTAATATTGGAGGTATGAAAATTGTATATGAAAAATCTCAACTAGCACCTAGAAAA | 4260 |
| CN10_Nevis_2020      | CCAAGTAATATTGGAGGTATGAAAATTGTATATGAAAAATCTCAACTAGCACCTAGAAAA | 4260 |
| CN14_Nevis_2020      | CCAAGTAATATTGGAGGTATGAAAATTGTATATGAAAAATCTCAACTAGCACCTAGAAAA | 4260 |
| CN20_Nevis_2020      | CCAAGTAATATTGGAGGTATGAAAATTGTATATGAAAAATCTCAACTAGCACCTAGAAAA | 4260 |
|                      | *****                                                        |      |

|                      |           |      |
|----------------------|-----------|------|
| CPV12_USA_1978       | TTATATTAA | 4269 |
| RVC50_St._Kitts_2016 | TTATATTAA | 4269 |
| CN10_Nevis_2020      | TTATATTAA | 4269 |
| CN14_Nevis_2020      | TTATATTAA | 4269 |
| CN20_Nevis_2020      | TTATATTAA | 4269 |
|                      | *****     |      |
