# Supplementary material for: Molecular Investigation of Canine Parvovirus-2 (CPV-2) Outbreak in Nevis Island: Analysis of the Nearly Complete Genomes of CPV-2 Strains from the Caribbean Region
Source: MDPI journal article supplement (doi:10.3390/v13061083), 2021-06-06
Supplement: s1 [file s1]

[illegible]

CPV-2

## 2 strains from Raccoons

## FPV strains
