# Supplementary material for: Molecular Investigation of Canine Parvovirus-2 (CPV-2) Outbreak in Nevis Island: Analysis of the Nearly Complete Genomes of CPV-2 Strains from the Caribbean Region
Source: MDPI journal article supplement (doi:10.3390/v13061083), 2021-06-06
Supplement: s1 [file s1]

**Supplementary material S1.** Primers used in the present study. Five primer pairs (highlighted with green) were employed in overlapping PCRs to amplify the nearly complete genomes of the canine parvovirus-2 (CPV-2) strains from St. Kitts and Nevis. PCR primers as well as forward and reverse internal primers were used for obtaining the CPV-2 sequences. The internal primers are also shown in the table. Overlapping PCR reactions -4 and -5 amplified the complete VP2 ORF of CPV-2 strains. PCR reaction-4 was used as the screening assay.

| PCR reaction | Primer name   | Primer sequence (5'-3') <sup>1</sup> | Primer position <sup>2</sup> |
|--------------|---------------|--------------------------------------|------------------------------|
| 1            | CPV2-1F       | ATG TCT GGC AAC CAG TAT ACT GAG      | nt 272-nt 295                |
|              | CPV2-1160R    | CTC TTT TAC TAA CCA AGT CCC GC       | nt 1160-nt 1138              |
|              | CPV2-324F     | AGA AAC ATG CAG AAA ATG AAG C        | nt 324-nt 345                |
|              | CPV2-768R     | TTT ACC GAA CAA AGA GTC ACC          | nt 768-nt 748                |
|              | CPV2-807F     | CAG AAG ATA GTG AAT GGG TGA C        | nt 807-nt 828                |
|              | CPV2-1136R    | AAG TAC ATT TGA TTG ACA CTT CC       | nt 1136-nt 1114              |
| 2            | CPV2-929F     | GTC CAC ATG ACA AAA GAA AGT GGC      | nt 929-nt 952                |
|              | CPV2-1970R    | CCG CCC AGT TTT CAT CCC ATT C        | nt 1970-nt 1949              |
|              | CPV2-961F     | AAG TAC TGA TTC TGG TTG GAA A        | nt 961-nt 981                |
|              | CPV2-1424R    | CAC ATG CTA TAG CGT GAC AAA C        | nt 1424-nt 1403              |
|              | CPV2-1465F    | TCA TGG ACC AGC AAG TAC AGG          | nt 1465-nt 1485              |
|              | CPV2-1933R    | ATG ATG TGT ATA GTT AGC CAT GG       | nt 1933-nt 1911              |
| 3            | CPV2-1772F    | CCT GAA CAT ACA CAA CCA ATA AGA G    | nt 1772-nt 1796              |
|              | CPV2-2921R    | TGA AAG TAC CCG TAG AAA TCC CC       | nt 2921-nt 2899              |
|              | CPV2-1820F    | GTA TGT AAG CTT CCA GGA GAC          | nt 1820-nt 1840              |
|              | CPV2-2304R    | CTC TTT GCC GGA GGT GCC ATC          | nt 2304-nt 2284              |
|              | CPV2-2399F    | CCA GGT TAT AAA TAT CTT GGG CC       | nt 2399-nt 2421              |
|              | CPV2-2870R    | CTC CAG ACC CGT TCC CAG ATC          | nt 2870-nt 2850              |
| 4            | CPV2-V2-2786F | ATG AGT GAT GGA GCA GTT CAA CC       | nt 2786-nt 2808              |
|              | CPV2-V2-3726R | CGT CTT TTA TCT TGT TGA ACT CC       | nt 3726-nt 3704              |
|              | CPV2-V2-2816F | GGT CAA CCT GCT GTC AGA AAT G        | nt 2816-nt 2837              |
|              | CPV2-V2-3093R | GCA TGA GTA TCA TCT AAA GCC ATG      | nt 3093-nt 3070              |
| 5            | CPV2-V2-3465F | GCA CAC CAA CAA ATA TAT ACC ATG G    | nt 3465-nt 3489              |
|              | CPV2-V2-4585R | GGT GCT AGT TGA TAT GTA ATA AAC A    | nt 4585-nt 4561              |
|              | CPV2-V2-4151F | GCA TTA AAT AAT GTG CCA CCA G        | nt 4151-nt 4172              |
|              | CPV2-V2-4378R | ACC TTT CCA CCA AAA ATC TGA G        | nt 4378-nt 4357              |

<sup>1</sup> The primer sequences were designed from conserved regions following multiple alignment of the complete/nearly complete genomes of several CPV-2 strains representing the different CPV-2 variants (CPV-2, CPV-2a, CPV-2b, CPV-2c, new CPV-2a and new CPV-2b strains).

<sup>2</sup> Nucleotide (nt) position corresponds to that of reference CPV-2 strain CPV-N, GenBank accession number M19296.
