# Supplementary material for: Molecular Investigation of Canine Parvovirus-2 (CPV-2) Outbreak in Nevis Island: Analysis of the Nearly Complete Genomes of CPV-2 Strains from the Caribbean Region
Source: MDPI journal article supplement (doi:10.3390/v13061083), 2021-06-06
Supplement: s1 [file s1]

**Supplementary material S3.** Multiple alignment of the VP2 coding sequences of canine parvovirus-2 (CPV-2) strains detected in Nevis (designated with prefix CN) during 2020 with those reported from the neighboring island of St. Kitts in 2016 (strain RVC50) and in 2020 (strains CK81 and CK84). Synonymous mutations are indicated with green, whilst nonsynonymous mutations are shown with red. A ‘\*’ denotes an identical nucleotide (nt) residue, whilst ‘-’ indicates absence of a nt residue. Numbers to the right indicate the positions of the nt for respective CPV-2 strains.

```

CN7_VP2      ATGAGTGTATGGAGCAGTTCAACCAGACGGTGGTCAACCTGCTGTCAGAAATGAAAGAGCA 60
CN8_VP2      ATGAGTGTATGGAGCAGTTCAACCAGACGGTGGTCAACCTGCTGTCAGAAATGAAAGAGCA 60
CN10_VP2     ATGAGTGTATGGAGCAGTTCAACCAGACGGTGGTCAACCTGCTGTCAGAAATGAAAGAGCA 60
CN11_VP2     ATGAGTGTATGGAGCAGTTCAACCAGACGGTGGTCAACCTGCTGTCAGAAATGAAAGAGCA 60
CN12_VP2     ATGAGTGTATGGAGCAGTTCAACCAGACGGTGGTCAACCTGCTGTCAGAAATGAAAGAGCA 60
CN13_VP2     ATGAGTGTATGGAGCAGTTCAACCAGACGGTGGTCAACCTGCTGTCAGAAATGAAAGAGCA 60
CN14_VP2     ATGAGTGTATGGAGCAGTTCAACCAGACGGTGGTCAACCTGCTGTCAGAAATGAAAGAGCA 60
CN15_VP2     ATGAGTGTATGGAGCAGTTCAACCAGACGGTGGTCAACCTGCTGTCAGAAATGAAAGAGCA 60
CN16_VP2     ATGAGTGTATGGAGCAGTTCAACCAGACGGTGGTCAACCTGCTGTCAGAAATGAAAGAGCA 60
CN17_VP2     ATGAGTGTATGGAGCAGTTCAACCAGACGGTGGTCAACCTGCTGTCAGAAATGAAAGAGCA 60
CN18_VP2     ATGAGTGTATGGAGCAGTTCAACCAGACGGTGGTCAACCTGCTGTCAGAAATGAAAGAGCA 60
CN19_VP2     ATGAGTGTATGGAGCAGTTCAACCAGACGGTGGTCAACCTGCTGTCAGAAATGAAAGAGCA 60
CN20_VP2     ATGAGTGTATGGAGCAGTTCAACCAGACGGTGGTCAACCTGCTGTCAGAAATGAAAGAGCA 60
CN21_VP2     ATGAGTGTATGGAGCAGTTCAACCAGACGGTGGTCAACCTGCTGTCAGAAATGAAAGAGCA 60
CN22_VP2     ATGAGTGTATGGAGCAGTTCAACCAGACGGTGGTCAACCTGCTGTCAGAAATGAAAGAGCA 60
CN23_VP2     ATGAGTGTATGGAGCAGTTCAACCAGACGGTGGTCAACCTGCTGTCAGAAATGAAAGAGCA 60
CN24_VP2     ATGAGTGTATGGAGCAGTTCAACCAGACGGTGGTCAACCTGCTGTCAGAAATGAAAGAGCA 60
CN25_VP2     ATGAGTGTATGGAGCAGTTCAACCAGACGGTGGTCAACCTGCTGTCAGAAATGAAAGAGCA 60
CN26_VP2     ATGAGTGTATGGAGCAGTTCAACCAGACGGTGGTCAACCTGCTGTCAGAAATGAAAGAGCA 60
CN27_VP2     ATGAGTGTATGGAGCAGTTCAACCAGACGGTGGTCAACCTGCTGTCAGAAATGAAAGAGCA 60
CN28_VP2     ATGAGTGTATGGAGCAGTTCAACCAGACGGTGGTCAACCTGCTGTCAGAAATGAAAGAGCA 60
CN29_VP2     ATGAGTGTATGGAGCAGTTCAACCAGACGGTGGTCAACCTGCTGTCAGAAATGAAAGAGCA 60
CN30_VP2     ATGAGTGTATGGAGCAGTTCAACCAGACGGTGGTCAACCTGCTGTCAGAAATGAAAGAGCA 60
CN31_VP2     ATGAGTGTATGGAGCAGTTCAACCAGACGGTGGTCAACCTGCTGTCAGAAATGAAAGAGCA 60
CN32_VP2     ATGAGTGTATGGAGCAGTTCAACCAGACGGTGGTCAACCTGCTGTCAGAAATGAAAGAGCA 60
CN33_VP2     ATGAGTGTATGGAGCAGTTCAACCAGACGGTGGTCAACCTGCTGTCAGAAATGAAAGAGCA 60
CN34_VP2     ATGAGTGTATGGAGCAGTTCAACCAGACGGTGGTCAACCTGCTGTCAGAAATGAAAGAGCA 60
CN35_VP2     ATGAGTGTATGGAGCAGTTCAACCAGACGGTGGTCAACCTGCTGTCAGAAATGAAAGAGCA 60
CN36_VP2     ATGAGTGTATGGAGCAGTTCAACCAGACGGTGGTCAACCTGCTGTCAGAAATGAAAGAGCA 60
CN37_VP2     ATGAGTGTATGGAGCAGTTCAACCAGACGGTGGTCAACCTGCTGTCAGAAATGAAAGAGCA 60
CN38_VP2     ATGAGTGTATGGAGCAGTTCAACCAGACGGTGGTCAACCTGCTGTCAGAAATGAAAGAGCA 60
CN39_VP2     ATGAGTGTATGGAGCAGTTCAACCAGACGGTGGTCAACCTGCTGTCAGAAATGAAAGAGCA 60
CN40_VP2     ATGAGTGTATGGAGCAGTTCAACCAGACGGTGGTCAACCTGCTGTCAGAAATGAAAGAGCA 60
CK81_VP2     ATGAGTGTATGGAGCAGTTCAACCAGACGGTGGTCAACCTGCTGTCAGAAATGAAAGAGCA 60
CK84_VP2     ATGAGTGTATGGAGCAGTTCAACCAGACGGTGGTCAACCTGCTGTCAGAAATGAAAGAGCA 60
RVC50_VP2    ATGAGTGTATGGAGCAGTTCAACCAGACGGTGGTCAACCTGCTGTCAGAAATGAAAGAGCA 60
*****
CN7_VP2      ACAGGATCTGGGAACGGGTCTGGAGGCGGGGGTGGTGGTGGTCTGGGGGTGTGGGGATT 120
CN8_VP2      ACAGGATCTGGGAACGGGTCTGGAGGCGGGGGTGGTGGTGGTCTGGGGGTGTGGGGATT 120
CN10_VP2     ACAGGATCTGGGAACGGGTCTGGAGGCGGGGGTGGTGGTGGTCTGGGGGTGTGGGGATT 120
CN11_VP2     ACAGGATCTGGGAACGGGTCTGGAGGCGGGGGTGGTGGTGGTCTGGGGGTGTGGGGATT 120
CN12_VP2     ACAGGATCTGGGAACGGGTCTGGAGGCGGGGGTGGTGGTGGTCTGGGGGTGTGGGGATT 120
CN13_VP2     ACAGGATCTGGGAACGGGTCTGGAGGCGGGGGTGGTGGTGGTCTGGGGGTGTGGGGATT 120
CN14_VP2     ACAGGATCTGGGAACGGGTCTGGAGGCGGGGGTGGTGGTGGTCTGGGGGTGTGGGGATT 120
CN15_VP2     ACAGGATCTGGGAACGGGTCTGGAGGCGGGGGTGGTGGTGGTCTGGGGGTGTGGGGATT 120
CN16_VP2     ACAGGATCTGGGAACGGGTCTGGAGGCGGGGGTGGTGGTGGTCTGGGGGTGTGGGGATT 120
CN17_VP2     ACAGGATCTGGGAACGGGTCTGGAGGCGGGGGTGGTGGTGGTCTGGGGGTGTGGGGATT 120
CN18_VP2     ACAGGATCTGGGAACGGGTCTGGAGGCGGGGGTGGTGGTGGTCTGGGGGTGTGGGGATT 120
CN19_VP2     ACAGGATCTGGGAACGGGTCTGGAGGCGGGGGTGGTGGTGGTCTGGGGGTGTGGGGATT 120
CN20_VP2     ACAGGATCTGGGAACGGGTCTGGAGGCGGGGGTGGTGGTGGTCTGGGGGTGTGGGGATT 120
CN21_VP2     ACAGGATCTGGGAACGGGTCTGGAGGCGGGGGTGGTGGTGGTCTGGGGGTGTGGGGATT 120
CN22_VP2     ACAGGATCTGGGAACGGGTCTGGAGGCGGGGGTGGTGGTGGTCTGGGGGTGTGGGGATT 120
CN23_VP2     ACAGGATCTGGGAACGGGTCTGGAGGCGGGGGTGGTGGTGGTCTGGGGGTGTGGGGATT 120
CN24_VP2     ACAGGATCTGGGAACGGGTCTGGAGGCGGGGGTGGTGGTGGTCTGGGGGTGTGGGGATT 120
CN25_VP2     ACAGGATCTGGGAACGGGTCTGGAGGCGGGGGTGGTGGTGGTCTGGGGGTGTGGGGATT 120
CN26_VP2     ACAGGATCTGGGAACGGGTCTGGAGGCGGGGGTGGTGGTGGTCTGGGGGTGTGGGGATT 120
CN27_VP2     ACAGGATCTGGGAACGGGTCTGGAGGCGGGGGTGGTGGTGGTCTGGGGGTGTGGGGATT 120
CN28_VP2     ACAGGATCTGGGAACGGGTCTGGAGGCGGGGGTGGTGGTGGTCTGGGGGTGTGGGGATT 120
CN29_VP2     ACAGGATCTGGGAACGGGTCTGGAGGCGGGGGTGGTGGTGGTCTGGGGGTGTGGGGATT 120
CN30_VP2     ACAGGATCTGGGAACGGGTCTGGAGGCGGGGGTGGTGGTGGTCTGGGGGTGTGGGGATT 120
CN31_VP2     ACAGGATCTGGGAACGGGTCTGGAGGCGGGGGTGGTGGTGGTCTGGGGGTGTGGGGATT 120
CN32_VP2     ACAGGATCTGGGAACGGGTCTGGAGGCGGGGGTGGTGGTGGTCTGGGGGTGTGGGGATT 120
CN33_VP2     ACAGGATCTGGGAACGGGTCTGGAGGCGGGGGTGGTGGTGGTCTGGGGGTGTGGGGATT 120
CN34_VP2     ACAGGATCTGGGAACGGGTCTGGAGGCGGGGGTGGTGGTGGTCTGGGGGTGTGGGGATT 120
CN35_VP2     ACAGGATCTGGGAACGGGTCTGGAGGCGGGGGTGGTGGTGGTCTGGGGGTGTGGGGATT 120
CN36_VP2     ACAGGATCTGGGAACGGGTCTGGAGGCGGGGGTGGTGGTGGTCTGGGGGTGTGGGGATT 120
CN37_VP2     ACAGGATCTGGGAACGGGTCTGGAGGCGGGGGTGGTGGTGGTCTGGGGGTGTGGGGATT 120
CN38_VP2     ACAGGATCTGGGAACGGGTCTGGAGGCGGGGGTGGTGGTGGTCTGGGGGTGTGGGGATT 120
CN39_VP2     ACAGGATCTGGGAACGGGTCTGGAGGCGGGGGTGGTGGTGGTCTGGGGGTGTGGGGATT 120
CN40_VP2     ACAGGATCTGGGAACGGGTCTGGAGGCGGGGGTGGTGGTGGTCTGGGGGTGTGGGGATT 120
CK81_VP2     ACAGGATCTGGGAACGGGTCTGGAGGCGGGGGTGGTGGTGGTCTGGGGGTGTGGGGATT 120
CK84_VP2     ACAGGATCTGGGAACGGGTCTGGAGGCGGGGGTGGTGGTGGTCTGGGGGTGTGGGGATT 120
RVC50_VP2    ACAGGATCTGGGAACGGGTCTGGAGGCGGGGGTGGTGGTGGTCTGGGGGTGTGGGGATT 120
*****

```

[illegible]

[illegible]

[illegible]

[illegible]

[illegible]

[illegible]

[illegible]



[illegible]

[illegible]

[illegible]

[illegible]

[illegible]

[illegible]

[illegible]
