# Supplementary material for: Molecular Investigation of Canine Parvovirus-2 (CPV-2) Outbreak in Nevis Island: Analysis of the Nearly Complete Genomes of CPV-2 Strains from the Caribbean Region
Source: MDPI journal article supplement (doi:10.3390/v13061083), 2021-06-06
Supplement: s1 [file s1]

**Supplementary material S6.** Multiple alignment of the putative NS1 (A), NS2 (B), VP1 (C) and VP2 (D) proteins of canine parvovirus-2 (CPV-2) strain CPV12 (GenBank accession number MN451655, representing the earliest CPV-2 strains from the late 1970s) and CPV-2 strains detected on St. Kitts in 2016 (strain RVC50) and Nevis in 2020 (strains CN10, CN14 and CN20). A ‘\*’ denotes an identical amino acid (aa) residue. Numbers to the right indicate the positions of the aa for respective CPV-2 strains.

## (A) NS1

```

CPV12_NS1      MSGNQYTEEVMEGVNWLKKHAENEAFS FVKCDNVQLNGK DVRWNNYTKPIQNEELTS LI 60
CN10_NS1      MSGNQYTEEVMEGVNWLKKHAENEAFS FVKCDNVQLNGK DVRWNNYTKPIQNEELTS LI 60
CN14_NS1      MSGNQYTEEVMEGVNWLKKHAENEAFS FVKCDNVQLNGK DVRWNNYTKPIQNEELTS LI 60
CN20_NS1      MSGNQYTEEVMEGVNWLKKHAENEAFS FVKCDNVQLNGK DVRWNNYTKPIQNEELTS LI 60
RVC50_NS1      MSGNQYTEEVMEGVNWLKKHAENEAFS FVKCDNVQLNGK DVRWNNYTKPIQNEELTS LI 60
*****

CPV12_NS1      RGAQTAMDQTEEEEMDWESEVDSLAKKQVQTFDALIKKCLFEV FVSKNIEPNECVWFIQH 120
CN10_NS1      RGAQTAMDQTEEEEMDWESEVDSLAKKQVQTFDALIKKCLFEV FVSKNIEPNECVWFIQH 120
CN14_NS1      RGAQTAMDQTEEEEMDWESEVDSLAKKQVQTFDALIKKCLFEV FVSKNIEPNECVWFIQH 120
CN20_NS1      RGAQTAMDQTEEEEMDWESEVDSLAKKQVQTFDALIKKCLFEV FVSKNIEPNECVWFIQH 120
RVC50_NS1      RGAQTAMDQTEEEEMDWESEVDSLAKKQVQTFDALIKKCLFEV FVSKNIEPNECVWFIQH 120
*****

CPV12_NS1      EWGKDQGWCHVLLH SKNLQQATGKWLRRQMNMYWSRWLVTLCSVNLTPTEKIKLREIAE 180
CN10_NS1      EWGKDQGWCHVLLH SKNLQQATGKWLRRQMNMYWSRWLVTLCSVNLTPTEKIKLREIAE 180
CN14_NS1      EWGKDQGWCHVLLH SKNLQQATGKWLRRQMNMYWSRWLVTLCSVNLTPTEKIKLREIAE 180
CN20_NS1      EWGKDQGWCHVLLH SKNLQQATGKWLRRQMNMYWSRWLVTLCSVNLTPTEKIKLREIAE 180
RVC50_NS1      EWGKDQGWCHVLLH SKNLQQATGKWLRRQMNMYWSRWLVTLCSVNLTPTEKIKLREIAE 180
*****

CPV12_NS1      DSEWVTILTYRHKQTKKDYVKMVHFGNMIAYYFLTKKKIVHMTKESGYFLSTD SGWKFN F 240
CN10_NS1      DSEWVTILTYRHKQTKKDYVKMVHFGNMIAYYFLTKKKIVHMTKESGYFLSTD SGWKFN F 240
CN14_NS1      DSEWVTILTYRHKQTKKDYVKMVHFGNMIAYYFLTKKKIVHMTKESGYFLSTD SGWKFN F 240
CN20_NS1      DSEWVTILTYRHKQTKKDYVKMVHFGNMIAYYFLTKKKIVHMTKESGYFLSTD SGWKFN F 240
RVC50_NS1      DSEWVTILTYRHKQTKKDYVKMVHFGNMIAYYFLTKKKIVHMTKESGYFLSTD SGWKFN F 240
*****

CPV12_NS1      MKYQDRQIVSTLYTEQMKPETVETT VTTAQETKRGRIQTKKEVS IKCTLRDLVSKRV TSP 300
CN10_NS1      MKYQDRQIVSTLYTEQMKPETVETT VTTAQETKRGRIQTKKEVS IKCTLRDLVSKRV TSP 300
CN14_NS1      MKYQDRQIVSTLYTEQMKPETVETT VTTAQETKRGRIQTKKEVS IKCTLRDLVSKRV TSP 300
CN20_NS1      MKYQDRQIVSTLYTEQMKPETVETT VTTAQETKRGRIQTKKEVS IKCTLRDLVSKRV TSP 300
RVC50_NS1      MKYQDRQIVSTLYTEQMKPETVETT VTTAQETKRGRIQTKKEVS IKCTLRDLVSKRV TSP 300
*****

CPV12_NS1      EDWMMLQPDSYIEMMAQPGGENLLKNTLEICTLTLARTKTA FELILEKADNTKLTNFDLA 360
CN10_NS1      EDWMMLQPDSYIEMMAQPGGENLLKNTLEICTLTLARTKTA FELILEKADNTKLTNFDLA 360
CN14_NS1      EDWMMLQPDSYIEMMAQPGGENLLKNTLEICTLTLARTKTA FELILEKADNTKLTNFDLA 360
CN20_NS1      EDWMMLQPDSYIEMMAQPGGENLLKNTLEICTLTLARTKTA FELILEKADNTKLTNFDLA 360
RVC50_NS1      EDWMMLQPDSYIEMMAQPGGENLLKNTLEICTLTLARTKTA FELILEKADNTKLTNFDLA 360
*****

CPV12_NS1      NSRTCQIFRMHGWNWIKVCHAIACVLNRQGGKRNTVLFHGPASTGKSIIAQAI AQAVGNV 420
CN10_NS1      NSRTCQIFRMHGWNWIKVCHAIACVLNRQGGKRNTVLFHGPASTGKSIIAQAI AQAVGNV 420
CN14_NS1      NSRTCQIFRMHGWNWIKVCHAIACVLNRQGGKRNTVLFHGPASTGKSIIAQAI AQAVGNV 420
CN20_NS1      NSRTCQIFRMHGWNWIKVCHAIACVLNRQGGKRNTVLFHGPASTGKSIIAQAI AQAVGNV 420
RVC50_NS1      NSRTCQIFRMHGWNWIKVCHAIACVLNRQGGKRNTVLFHGPASTGKSIIAQAI AQAVGNV 420
*****

CPV12_NS1      GCYNAANVNFPFNDCTNKNLIWIEEAGNFGQQVNQFKAICSGQTIRIDQKGKGS KQIEPT 480
CN10_NS1      GCYNAANVNFPFNDCTNKNLIWIEEAGNFGQQVNQFKAICSGQTIRIDQKGKGS KQIEPT 480
CN14_NS1      GCYNAANVNFPFNDCTNKNLIWIEEAGNFGQQVNQFKAICSGQTIRIDQKGKGS KQIEPT 480
CN20_NS1      GCYNAANVNFPFNDCTNKNLIWIEEAGNFGQQVNQFKAICSGQTIRIDQKGKGS KQIEPT 480
RVC50_NS1      GCYNAANVNFPFNDCTNKNLIWIEEAGNFGQQVNQFKAICSGQTIRIDQKGKGS KQIEPT 480
*****

CPV12_NS1      PVIMTTNENITIVRIGCEERPEHTQPIRDRMLNIKL VCKLPGDFGLVDKEEWPLICAWLV 540
CN10_NS1      PVIMTTNENITIVRIGCEERPEHTQPIRDRMLNIKL VCKLPGDFGLVDKEEWPLICAWLV 540
CN14_NS1      PVIMTTNENITIVRIGCEERPEHTQPIRDRMLNIKL VCKLPGDFGLVDKEEWPLICAWLV 540
CN20_NS1      PVIMTTNENITIVRIGCEERPEHTQPIRDRMLNIKL VCKLPGDFGLVDKEEWPLICAWLV 540
RVC50_NS1      PVIMTTNENITIVRIGCEERPEHTQPIRDRMLNIKL VCKLPGDFGLVDKEEWPLICAWLV 540
*****

```

|           |                                                             |     |
|-----------|-------------------------------------------------------------|-----|
| CPV12_NS1 | KHGYESTMANYTHHWGKVPEDENWAEFKIQEGINSPGCKDLETQAASNPQSQDQVLTPL | 600 |
| CN10_NS1  | KHGYESTMANYTHHWGKVPEDENWAEFKIQEGINSPGCKDLETQAASNPQSQDQVLTPL | 600 |
| CN14_NS1  | KHGYESTMANYTHHWGKVPEDENWAEFKIQEGINSPGCKDLETQAASNPQSQDQVLTPL | 600 |
| CN20_NS1  | KHGYESTMANYTHHWGKVPEDENWAEFKIQEGINSPGCKDLETQAASNPQSQDQVLTPL | 600 |
| RVC50_NS1 | KHGYESTMANYTHHWGKVPEDENWAEFKIQEGINSPGCKDLETQAASNPQSQDQVLTPL | 600 |
|           | *****                                                       |     |

|           |                                                              |     |
|-----------|--------------------------------------------------------------|-----|
| CPV12_NS1 | TPDVVDLALAPWSTPDTPIAETANQQSNQLGVTHKDVQASPTWSEIEADLRAIFTSEQLE | 660 |
| CN10_NS1  | TPDVVDLALAPWSTPDTPIAETANQQSNQLGVTHKDVQASPTWSEIEADLRAIFTSEQLE | 660 |
| CN14_NS1  | TPDVVDLALAPWSTPDTPIAETANQQSNQLGVTHKDVQASPTWSEIEADLRAIFTSEQLE | 660 |
| CN20_NS1  | TPDVVDLALAPWSTPDTPIAETANQQSNQLGVTHKDVQASPTWSEIEADLRAIFTSEQLE | 660 |
| RVC50_NS1 | TPDVVDLALAPWSTPDTPIAETANQQSNQLGVTHKDVQASPTWSEIEADLRAIFTSEQLE | 660 |
|           | *****                                                        |     |

|           |          |     |
|-----------|----------|-----|
| CPV12_NS1 | EDFRDDLD | 668 |
| CN10_NS1  | EDFRDDLD | 668 |
| CN14_NS1  | EDFRDDLD | 668 |
| CN20_NS1  | EDFRDDLD | 668 |
| RVC50_NS1 | EDFRDDLD | 668 |
|           | *****    |     |

**(B) NS2**

```
CPV12_NS2      MSGNQYTEEVMEGVNWLKKHAENEAFSFVKCDNVQLNGKDVRWNNYTKPIQNEELTSI  60
CN10_NS2       MSGNQYTEEVMEGVNWLKKHAENEAFSFVKCDNVQLNGKDVRWNNYTKPIQNEELTSI  60
CN14_NS2       MSGNQYTEEVMEGVNWLKKHAENEAFSFVKCDNVQLNGKDVRWNNYTKPIQNEELTSI  60
CN20_NS2       MSGNQYTEEVMEGVNWLKKHAENEAFSFVKCDNVQLNGKDVRWNNYTKPIQNEELTSI  60
RVC50_NS2      MSGNQYTEEVMEGVNWLKKHAENEAFSFVKCDNVQLNGKDVRWNNYTKPIQNEELTSI  60
                *****

CPV12_NS2      RGAQTAMDQTEEEEMDWESEVDSLAKKLQRLDTSKGQSSESRPSSNSSDSGRSGPCTGT  120
CN10_NS2       RGAQTAMDQTEEEEMDWESEVDSLAKKLQRLDASGQSSESRPSSNSSDSGRSGPCTGT  120
CN14_NS2       RGAQTAMDQTEEEEMDWESEVDSLAKKLQRLDASGQSSESRPSSNSSDSGRSGPCTGT  120
CN20_NS2       RGAQTAMDQTEEEEMDWESEVDSLAKKLQRLDASGQSSESRPSSNSSDSGRSGPCTGT  120
RVC50_NS2      RGAQTAMDQTEEEEMDWESEVDSLAKKLQRLDASGQSSESRPSSNSSDSGRSGPCTGT  120
                *****:*****

CPV12_NS2      VEYSRYAYCRNCKSTIKPTWRYSQRRASESDMVRNRGRPESHLYF  165
CN10_NS2       VEYSRYAYCRNCKSTIKPTWRYSQRRASESNVVRNRGRPESHLYF  165
CN14_NS2       VEYSRYAYCRNCKSTIKPTWRYSQRRASESNVVRNRGRPESHLYF  165
CN20_NS2       VEYSRYAYCRNCKSTIKPTWRYSQRRASESNVVRNRGRPESHLYF  165
RVC50_NS2      VEYSRYAYCRNCKSTIKPTWRYSQRRASESNVVRNRGRPESHLYF  165
                *****:*****
```

## (C) VP1

```
CPV12_VP1      MAPPAKRARRGLVPPGYKYLGPNSLDQGEPTNPSDAAAKEHDEAYAAAYLRSGKNPYLYF 60
CN10_VP1       MAPPAKRARRGLVPPGYKYLGPNSLDQGEPTNPSDAAAKEHDEAYAAAYLRSGKNPYLYF 60
CN14_VP1       MAPPAKRARRGLVPPGYKYLGPNSLDQGEPTNPSDAAAKEHDEAYAAAYLRSGKNPYLYF 60
CN20_VP1       MAPPAKRARRGLVPPGYKYLGPNSLDQGEPTNPSDAAAKEHDEAYAAAYLRSGKNPYLYF 60
RVC50_VP1      MAPPAKRARRGLVPPGYKYLGPNSLDQGEPTNPSDAAAKEHDEAYAAAYLRSGKNPYLYF 60
*****

CPV12_VP1      SPADQRFIDQTKDAKDWGGKIGHYFFRAKKAIAPVLTDTDPHPSTSRPTKPTKRSKPPPH 120
CN10_VP1       SPADQRFIDQTKDAKDWGGKIGHYFFRAKKAIAPVLTDTDPHPSTSRPTKPTKRSKPPPH 120
CN14_VP1       SPADQRFIDQTKDAKDWGGKIGHYFFRAKKAIAPVLTDTDPHPSTSRPTKPTKRSKPPPH 120
CN20_VP1       SPADQRFIDQTKDAKDWGGKIGHYFFRAKKAIAPVLTDTDPHPSTSRPTKPTKRSKPPPH 120
RVC50_VP1      SPADQRFIDQTKDAKDWGGKIGHYFFRAKKAIAPVLTDTDPHPSTSRPTKPTKRSKPPPH 120
*****

CPV12_VP1      IFINLAKKKKAGAGQVKRDNLAPMSDGAVQPDGGQPAVRNERATGSGNGSGGGGGGGSGG 180
CN10_VP1       IFINLAKKKKAGAGQVKRDNLAPMSDGAVQPDGGQPAVRNERATGSGNGSGGGGGGGSGG 180
CN14_VP1       IFINLAKKKKAGAGQVKRDNLAPMSDGAVQPDGGQPAVRNERATGSGNGSGGGGGGGSGG 180
CN20_VP1       IFINLAKKKKAGAGQVKRDNLAPMSDGAVQPDGGQPAVRNERATGSGNGSGGGGGGGSGG 180
RVC50_VP1      IFINLAKKKKAGAGQVKRDNLAPMSDGAVQPDGGQPAVRNERATGSGNGSGGGGGGGSGG 180
*****

CPV12_VP1      VGISTGTFFNNQTEFKFLENGWVEITANSSRLVHLNMPESENYRRVVVNNMDKTAVNGNMA 240
CN10_VP1       VGISTGTFFNNQTEFKFLENGWVEITANSSRLVHLNMPESENYRRVVVNNMDKTAVNGNMA 240
CN14_VP1       VGISTGTFFNNQTEFKFLENGWVEITANSSRLVHLNMPESENYRRVVVNNMDKTAVNGNMA 240
CN20_VP1       VGISTGTFFNNQTEFKFLENGWVEITANSSRLVHLNMPESENYRRVVVNNMDKTAVNGNMA 240
RVC50_VP1      VGISTGTFFNNQTEFKFLENGWVEITANSSRLVHLNMPESENYRRVVVNNMDKTAVNGNMA 240
*****:*****

CPV12_VP1      LDDTHAQIVTPWSLVDANAWGVWFNPGDWQLIVNTMSELHLVSFEQEIFNVVLKTVSESA 300
CN10_VP1       LDDTHAQIVTPWSLVDANAWGVWFNPGDWQLIVNTMSELHLVSFEQEIFNVVLKTVSESA 300
CN14_VP1       LDDTHAQIVTPWSLVDANAWGVWFNPGDWQLIVNTMSELHLVSFEQEIFNVVLKTVSESA 300
CN20_VP1       LDDTHAQIVTPWSLVDANAWGVWFNPGDWQLIVNTMSELHLVSFEQEIFNVVLKTVSESA 300
RVC50_VP1      LDDTHAQIVTPWSLVDANAWGVWFNPGDWQLIVNTMSELHLVSFEQEIFNVVLKTVSESA 300
*** *****

CPV12_VP1      TQPPTKVYNNDLTASLMVALDSNNTMPFTPAAMRSETLGFYPWKPTIPTPWRYFQWDRT 360
CN10_VP1       TQPPTKVYNNDLTASLMVALDSNNTMPFTPAAMRSETLGFYPWKPTIPTPWRYFQWDRT 360
CN14_VP1       TQPPTKVYNNDLTASLMVALDSNNTMPFTPAAMRSETLGFYPWKPTIPTPWRYFQWDRT 360
CN20_VP1       TQPPTKVYNNDLTASLMVALDSNNTMPFTPAAMRSETLGFYPWKPTIPTPWRYFQWDRT 360
RVC50_VP1      TQPPTKVYNNDLTASLMVALDSNNTMPFTPAAMRSETLGFYPWKPTIPTPWRYFQWDRT 360
*****

CPV12_VP1      LIPSHTGTSPTPTNIYHGTDPPDVQFYTIENSVPVHLLRTGDEFATGTTTTDCKPCRLTH 420
CN10_VP1       LIPSHTGTSPTPTNIYHGTDPPDVQFYTIENSVPVHLLRTGDEFATGTTTTDCKPCRLTH 420
CN14_VP1       LIPSHTGTSPTPTNIYHGTDPPDVQFYTIENSVPVHLLRTGDEFATGTTTTDCKPCRLTH 420
CN20_VP1       LIPSHTGTSPTPTNIYHGTDPPDVQFYTIENSVPVHLLRTGDEFATGTTTTDCKPCRLTH 420
RVC50_VP1      LIPSHTGTSPTPTNIYHGTDPPDVQFYTIENSVPVHLLRTGDEFATGTTTTDCKPCRLTH 420
*****:*****

CPV12_VP1      TWQTNRALGLPPFLNSLPQAEAGTNFGYIGVQQDKRRGVTQMGNNTNYITEATIMRPAEVG 480
CN10_VP1       TWQTNRALGLPPFLNSLPQAEAGTNFGYIGVQQDKRRGVTQMGNNTNYITEATIMRPAEVG 480
CN14_VP1       TWQTNRALGLPPFLNSLPQAEAGTNFGYIGVQQDKRRGVTQMGNNTNYITEATIMRPAEVG 480
CN20_VP1       TWQTNRALGLPPFLNSLPQAEAGTNFGYIGVQQDKRRGVTQMGNNTNYITEATIMRPAEVG 480
RVC50_VP1      TWQTNRALGLPPFLNSLPQAEAGTNFGYIGVQQDKRRGVTQMGNNTNYITEATIMRPAEVG 480
*****:*.*****

CPV12_VP1      YSAPYYSFESTQGPFTPIAAGRGAQTDENQAADGNPRYAFGRQHGGKTTTGETPER 540
CN10_VP1       YSAPYYSFESTQGPFTPIAAGRGAQTDENQAADGNPRYAFGRQHGGKTTTGETPER 540
CN14_VP1       YSAPYYSFESTQGPFTPIAAGRGAQTDENQAADGNPRYAFGRQHGGKTTTGETPER 540
CN20_VP1       YSAPYYSFESTQGPFTPIAAGRGAQTDENQAADGNPRYAFGRQHGGKTTTGETPER 540
RVC50_VP1      YSAPYYSFESTQGPFTPIAAGRGAQTDENQAADGNPRYAFGRQHGGKTTTGETPER 540
*****:*.*****

CPV12_VP1      FTYIAHQDTGRYPEGDWIQNINFNLPVTNDNVLLPTDPIGGKTGINYTNIFNTYGPLTAL 600
CN10_VP1       FTYIAHQDTGRYPEGDWIQNINFNLPVTNDNVLLPTDPIGGKTGINYTNIFNTYGPLTAL 600
CN14_VP1       FTYIAHQDTGRYPEGDWIQNINFNLPVTNDNVLLPTDPIGGKTGINYTNIFNTYGPLTAL 600
CN20_VP1       FTYIAHQDTGRYPEGDWIQNINFNLPVTNDNVLLPTDPIGGKTGINYTNIFNTYGPLTAL 600
RVC50_VP1      FTYIAHQDTGRYPEGDWIQNINFNLPVTNDNVLLPTDPIGGKTGINYTNIFNTYGPLTAL 600
*****
```

|           |                                                              |     |
|-----------|--------------------------------------------------------------|-----|
| CPV12_VP1 | NNVPPVYPNGQIWDKEFDTDLKPRLHVNAFFVCQNNCPGQLFVKVAPNLTNEYDPDASAN | 660 |
| CN10_VP1  | NNVPPVYPNGQIWDKEFDTDLKPRLHVNAFFVCQNNCPGQLFVKVAPNLTNEYDPDASAN | 660 |
| CN14_VP1  | NNVPPVYPNGQIWDKEFDTDLKPRLHVNAFFVCQNNCPGQLFVKVAPNLTNEYDPDASAN | 660 |
| CN20_VP1  | NNVPPVYPNGQIWDKEFDTDLKPRLHVNAFFVCQNNCPGQLFVKVAPNLTNEYDPDASAN | 660 |
| RVC50_VP1 | NNVPPVYPNGQIWDKEFDTDLKPRLHVNAFFVCQNNCPGQLFVKVAPNLTNEYDPDASAN | 660 |
|           | *****                                                        |     |

|           |                                                              |     |
|-----------|--------------------------------------------------------------|-----|
| CPV12_VP1 | MSRIVTYSDFWWKGKLVFKAKLRASHTWNPIQQMSINVDNQFNYVPSNIGGMKIVYEKSQ | 720 |
| CN10_VP1  | MSRIVTYSDFWWKGKLVFKAKLRASHTWNPIQQMSINVDNQFNYVPSNIGGMKIVYEKSQ | 720 |
| CN14_VP1  | MSRIVTYSDFWWKGKLVFKAKLRASHTWNPIQQMSINVDNQFNYVPSNIGGMKIVYEKSQ | 720 |
| CN20_VP1  | MSRIVTYSDFWWKGKLVFKAKLRASHTWNPIQQMSINVDNQFNYVPSNIGGMKIVYEKSQ | 720 |
| RVC50_VP1 | MSRIVTYSDFWWKGKLVFKAKLRASHTWNPIQQMSINVDNQFNYVPSNIGGMKIVYEKSQ | 720 |
|           | *****                                                        |     |

|           |         |     |
|-----------|---------|-----|
| CPV12_VP1 | LAPRKLY | 727 |
| CN10_VP1  | LAPRKLY | 727 |
| CN14_VP1  | LAPRKLY | 727 |
| CN20_VP1  | LAPRKLY | 727 |
| RVC50_VP1 | LAPRKLY | 727 |
|           | *****   |     |

## (D) VP2

```
CPV12_VP2      MSDGAVQPDGGQPAVRNERATGSGNGSGGGGGGGSGGVGISTGTFNQTEFKFLENGWVE 60
RVC50_VP2      MSDGAVQPDGGQPAVRNERATGSGNGSGGGGGGGSGGVGISTGTFNQTEFKFLENGWVE 60
CN10_VP2       MSDGAVQPDGGQPAVRNERATGSGNGSGGGGGGGSGGVGISTGTFNQTEFKFLENGWVE 60
CN14_VP2       MSDGAVQPDGGQPAVRNERATGSGNGSGGGGGGGSGGVGISTGTFNQTEFKFLENGWVE 60
CN20_VP2       MSDGAVQPDGGQPAVRNERATGSGNGSGGGGGGGSGGVGISTGTFNQTEFKFLENGWVE 60
*****

CPV12_VP2      ITANSSRLVHLNMPESENYRRVVVNNMDKTAVNGNMALDDIHAQIVTPWSLVDANAWGVW 120
RVC50_VP2      ITANSSRLVHLNMPESENYRRVVVNNMDKTAVNGNMALDDTHAQIVTPWSLVDANAWGVW 120
CN10_VP2       ITANSSRLVHLNMPESENYRRVVVNNMDKTAVNGNMALDDTHAQIVTPWSLVDANAWGVW 120
CN14_VP2       ITANSSRLVHLNMPESENYRRVVVNNMDKTAVNGNMALDDTHAQIVTPWSLVDANAWGVW 120
CN20_VP2       ITANSSRLVHLNMPESENYRRVVVNNMDKTAVNGNMALDDTHAQIVTPWSLVDANAWGVW 120
*****:*****

CPV12_VP2      FNPGDWQLIVNTMSELHLVSFEQEIFNVVLKTVSESATQPPTKVYNNDLTASLMVALDSN 180
RVC50_VP2      FNPGDWQLIVNTMSELHLVSFEQEIFNVVLKTVSESATQPPTKVYNNDLTASLMVALDSN 180
CN10_VP2       FNPGDWQLIVNTMSELHLVSFEQEIFNVVLKTVSESATQPPTKVYNNDLTASLMVALDSN 180
CN14_VP2       FNPGDWQLIVNTMSELHLVSFEQEIFNVVLKTVSESATQPPTKVYNNDLTASLMVALDSN 180
CN20_VP2       FNPGDWQLIVNTMSELHLVSFEQEIFNVVLKTVSESATQPPTKVYNNDLTASLMVALDSN 180
*****

CPV12_VP2      NTMPFTPAAMRSETLGFYPWKPTIPTPWRYFQWDRTLIPSHGTSGTPTNIYHGTDPPD 240
RVC50_VP2      NTMPFTPAAMRSETLGFYPWKPTIPTPWRYFQWDRTLIPSHGTSGTPTNIYHGTDPPD 240
CN10_VP2       NTMPFTPAAMRSETLGFYPWKPTIPTPWRYFQWDRTLIPSHGTSGTPTNIYHGTDPPD 240
CN14_VP2       NTMPFTPAAMRSETLGFYPWKPTIPTPWRYFQWDRTLIPSHGTSGTPTNIYHGTDPPD 240
CN20_VP2       NTMPFTPAAMRSETLGFYPWKPTIPTPWRYFQWDRTLIPSHGTSGTPTNIYHGTDPPD 240
*****

CPV12_VP2      VQFYTIENSVPVHLLRTGDEFATGTFFDCKPCRLTHTWQTNRALGLPPFLNSLPQSEGA 300
RVC50_VP2      VQFYTIENSVPVHLLRTGDEFATGTFFDCKPCRLTHTWQTNRALGLPPFLNSLPQAEAG 300
CN10_VP2       VQFYTIENSVPVHLLRTGDEFATGTFFDCKPCRLTHTWQTNRALGLPPFLNSLPQAEAG 300
CN14_VP2       VQFYTIENSVPVHLLRTGDEFATGTFFDCKPCRLTHTWQTNRALGLPPFLNSLPQAEAG 300
CN20_VP2       VQFYTIENSVPVHLLRTGDEFATGTFFDCKPCRLTHTWQTNRALGLPPFLNSLPQAEAG 300
*****:*****:*.

CPV12_VP2      TNFGDIGVQQDKRRGVQMGNTNYITEATIMRPAEVGYSAPIYSFEASTQGPFKTPIAAG 360
RVC50_VP2      TNFGYIGVQQDKRRGVQMGNTNYITEATIMRPAEVGYSAPIYSFEASTQGPFKTPIAAG 360
CN10_VP2       TNFGYIGVQQDKRRGVQMGNTNYITEATIMRPAEVGYSAPIYSFEASTQGPFKTPIAAG 360
CN14_VP2       TNFGYIGVQQDKRRGVQMGNTNYITEATIMRPAEVGYSAPIYSFEASTQGPFKTPIAAG 360
CN20_VP2       TNFGYIGVQQDKRRGVQMGNTNYITEATIMRPAEVGYSAPIYSFEASTQGPFKTPIAAG 360
**** *****

CPV12_VP2      RGGAQTDENQAADGNPRYAFGRQHGGKTTTTGETPERFTYIAHQDTGRYPEGDWIQNINF 420
RVC50_VP2      RGGAQTDENQAADGDPRYAFGRQHGGKTTTTGETPERFTYIAHQDTGRYPEGDWIQNINF 420
CN10_VP2       RGGAQTDENQAADGDPRYAFGRQHGGKTTTTGETPERFTYIAHQDTGRYPEGDWIQNINF 420
CN14_VP2       RGGAQTDENQAADGDPRYAFGRQHGGKTTTTGETPERFTYIAHQDTGRYPEGDWIQNINF 420
CN20_VP2       RGGAQTDENQAADGDPRYAFGRQHGGKTTTTGETPERFTYIAHQDTGRYPEGDWIQNINF 420
*****:*.

CPV12_VP2      NLPVTNDNVLLPTDPIGGKTGINYTNIFNTYGPLTALNNVPPVYPNGQIWDKEFDIDLKP 480
RVC50_VP2      NLPVTNDNVLLPTDPIGGKTGINYTNIFNTYGPLTALNNVPPVYPNGQIWDKEFDIDLKP 480
CN10_VP2       NLPVTNDNVLLPTDPIGGKTGINYTNIFNTYGPLTALNNVPPVYPNGQIWDKEFDIDLKP 480
CN14_VP2       NLPVTNDNVLLPTDPIGGKTGINYTNIFNTYGPLTALNNVPPVYPNGQIWDKEFDIDLKP 480
CN20_VP2       NLPVTNDNVLLPTDPIGGKTGINYTNIFNTYGPLTALNNVPPVYPNGQIWDKEFDIDLKP 480
*****

CPV12_VP2      RLHVNAPFVCQNNCPGQLFVKVAPNLTNEYDPDASANMSRIVTYSDFWWKGLVFKAKLR 540
RVC50_VP2      RLHVNAPFVCQNNCPGQLFVKVAPNLTNEYDPDASANMSRIVTYSDFWWKGLVFKAKLR 540
CN10_VP2       RLHVNAPFVCQNNCPGQLFVKVAPNLTNEYDPDASANMSRIVTYSDFWWKGLVFKAKLR 540
CN14_VP2       RLHVNAPFVCQNNCPGQLFVKVAPNLTNEYDPDASANMSRIVTYSDFWWKGLVFKAKLR 540
CN20_VP2       RLHVNAPFVCQNNCPGQLFVKVAPNLTNEYDPDASANMSRIVTYSDFWWKGLVFKAKLR 540
*****

CPV12_VP2      ASHTWNPIQQMSINVDNQFNYPVPSNIGGMKIVYEKSQLAPRKLY 584
RVC50_VP2      ASHTWNPIQQMSINVDNQFNYPVPSNIGGMKIVYEKSQLAPRKLY 584
CN10_VP2       ASHTWNPIQQMSINVDNQFNYPVPSNIGGMKIVYEKSQLAPRKLY 584
CN14_VP2       ASHTWNPIQQMSINVDNQFNYPVPSNIGGMKIVYEKSQLAPRKLY 584
CN20_VP2       ASHTWNPIQQMSINVDNQFNYPVPSNIGGMKIVYEKSQLAPRKLY 584
*****
```
