# Supplementary material for: Molecular Investigation of Canine Parvovirus-2 (CPV-2) Outbreak in Nevis Island: Analysis of the Nearly Complete Genomes of CPV-2 Strains from the Caribbean Region
Source: Viruses. 2021 Jun 6;13(6):1083. doi: 10.3390/v13061083 (PMC8227521; doi:10.3390/v13061083)
Supplement: Supplementary file 1 [file viruses-13-01083-s001.zip]

Archive with 9 entries (9 files):
- Supplementary materials_R1/Supplementary material S1.pdf
- Supplementary materials_R1/Supplementary material S2.pdf
- Supplementary materials_R1/Supplementary material S3.pdf
- Supplementary materials_R1/Supplementary material S4.pdf
- Supplementary materials_R1/Supplementary material S5.pdf
- Supplementary materials_R1/Supplementary material S6.pdf
- Supplementary materials_R1/Supplementary material S7.pdf
- Supplementary materials_R1/Supplementary material S8.pdf
- Supplementary materials_R1/Supplementary material S9.pdf
